# Supplementary material
Source: publisher figshare collection journal article supplement (https://acs.figshare.com/ndownloader/files/4207825)

## SUPPORTING INFORMATION

### Dehydrogenative Synthesis of Imines from Alcohols and Amines Catalyzed by a Ruthenium N-Heterocyclic Carbene Complex

Agnese Maggi and Robert Madsen\*

*Department of Chemistry, Technical University of Denmark*

*DK-2800 Lyngby, Denmark*

#### Table of Contents

|                                                                                                             | Page |
|-------------------------------------------------------------------------------------------------------------|------|
| General experimental methods                                                                                | 2    |
| General procedure for imination with Ru complexes <b>1</b> and [RuCl <sub>2</sub> (IMe)( <i>p</i> -cymene)] | 2    |
| General procedure for imination with catalysts generated in situ                                            | 2    |
| Determination of hydrogen development                                                                       | 3    |
| Addition of allylmetal reagents to ( <i>R</i> )- <i>N</i> -benzylidene-1-phenylethylamine                   | 3    |
| Determination of deuterium isotope effect                                                                   | 5    |
| Characterization data                                                                                       | 6    |
| References                                                                                                  | 13   |
| <sup>1</sup> H and <sup>13</sup> C NMR spectra                                                              | 14   |

## General experimental methods

All experiments were carried out under an argon flow using Schlenk flask techniques unless specified differently. Dry solvents were obtained by distillation from sodium and benzophenone under an argon atmosphere. The imidazolium salts 1,3-dimethylimidazolium iodide<sup>1</sup> and 1,3-di-*tert*-butylimidazolium chloride<sup>2</sup>, as well as complexes  $[\text{RuCl}_2(\text{I}i\text{Pr})(p\text{-cymene})]$  (**1**)<sup>3</sup> and  $[\text{RuCl}_2(\text{IMe})(p\text{-cymene})]$ <sup>4-5</sup> were synthesized following established procedures. Alcohol and amine conversions were obtained on a GCMS instrument equipped with an Equity-5 capillary column (30 m  $\times$  0.25 mm, 0.25  $\mu\text{m}$  film) using nonane as internal standard. During the GC analysis the injector temperature was 280  $^{\circ}\text{C}$ , and the temperature program was: 60  $^{\circ}\text{C}$ , hold 5 min, 20  $^{\circ}\text{C}/\text{min}$  to 280  $^{\circ}\text{C}$ , hold 5 min total run time 18 min. The GC was coupled to a mass spectrometer operating in positive EI mode.

## General procedure for imination with Ru complexes **1** and $[\text{RuCl}_2(\text{IMe})(p\text{-cymene})]$

Ruthenium complex (22.9 mg, 0.05 mmol), DABCO (11.2 mg, 0.1 mmol) and 4  $\text{\AA}$  molecular sieves (150 mg) were placed in an oven-dried Schlenk flask equipped with a cold finger. Vacuum was applied and the flask was then filled with argon (repeated twice). Freshly distilled toluene or mesitylene (1 mL), alcohol (1 mmol), amine (1 mmol) and nonane (0.2 mmol, internal standard) were added via syringe and the mixture was refluxed with stirring for 24 hours. After cooling to room temperature a sample of 50  $\mu\text{L}$  was taken, transferred to a GC vial, diluted to 1 mL with  $\text{CH}_2\text{Cl}_2$  and then subjected to GCMS analysis. After removal of the solvent, the crude product was purified by silica gel column chromatography (hexane: $\text{Et}_2\text{O}$  10:0 to 9:1 with 2% of  $\text{Et}_3\text{N}$ ) to afford the pure imine.

## General procedure for imination with catalysts generated in situ

$[\text{RuCl}_2(p\text{-cymene})]_2$  (15.3 mg, 0.025 mmol), DABCO (11.2 mg, 0.1 mmol), imidazolium salt (0.05 mmol),  $\text{KO}t\text{Bu}$  (11.2 mg, 0.05 mmol) and 4  $\text{\AA}$  molecular sieves (150 mg) were placed in an oven-dried Schlenk flask equipped with a cold finger. Vacuum was applied and the flask was then filled with argon (repeated twice). Freshly distilled toluene (1 mL) was added and the mixture was refluxed with stirring for 20 minutes. Benzyl alcohol (108 mg, 1 mmol), *tert*-

octylamine (129 mg, 1 mmol) and nonane (0.2 mmol, internal standard) were added via syringe and the mixture was refluxed with stirring for 24 hours. After cooling to room temperature a sample of 50  $\mu$ L was taken, transferred to a GC vial, diluted to 1 mL with  $\text{CH}_2\text{Cl}_2$  and then subjected to GCMS analysis.

### Determination of hydrogen development

Benzyl alcohol (213 mg, 2 mmol), *tert*-octylamine (262 mg, 2 mmol) and 4 Å molecular sieves (300 mg) were placed in an oven-dried Schlenk flask and subjected to the imination reaction following the general procedure for imination with ruthenium complex **1**.

A separate flask containing diphenylacetylene (213 mg, 0.2 mmol),  $\text{Pd}(\text{OAc})_2$  (3 mg, 0.01 mmol), charcoal (2.6 mg) and methanol (1 mL) was equipped with a septum and connected to the above Schlenk flask with a needle. The reaction mixtures were stirred over night at room temperature. In this way, the hydrogen gas developed during the imination was transferred to the separate flask causing the reduction of the alkyne bond.<sup>6</sup> GCMS analysis of the hydrogenation reaction showed the complete conversion of the alkyne into 1,2-diphenylethane (EI, Pos; RT = 12.16;  $[\text{M}]^+ = 182$ ).

### Addition of allylmetal reagents to (*R*)-*N*-benzylidene-1-phenylethylamine

#### *Addition of allylzinc bromide*

Crude (*R*)-*N*-benzylidene-1-phenylethylamine, synthesized following the imination procedure with ruthenium complex **1**, was dissolved in anhydrous THF (6 mL) and added drop wise to a THF (5 mL) solution of allylzinc bromide (4 mmol, prepared according to a reported procedure<sup>7</sup>) at -78 °C under an argon atmosphere. The reaction mixture was then stirred over night, while being allowed to reach room temperature. A sample was taken out and analyzed by GC-MS showing the complete conversion of the imine and formation of the corresponding homoallylic amine<sup>8-10</sup> as a mixture of the two diastereomers (S,R/R,R 54:46). The reaction was then quenched by addition of 10% aqueous NaOH (20 mL), the organic phase was separated and the aqueous phase was extracted three times with  $\text{Et}_2\text{O}$  (10 mL). The combined organic phases

were dried over Na<sub>2</sub>SO<sub>4</sub> and concentrated at reduced pressure to leave the crude amine. This was then purified by column chromatography (hexane:Et<sub>2</sub>O, 9.5:0.5) to afford 154 mg of the pure diastereomeric mixture (61% yield over two steps).

#### *Addition of B-allyl-9-BBN*

*B*-allyl-9-BBN was generated *in situ* following the procedure reported by Fang *et al.*<sup>11</sup> An oven-dried Schlenk flask was charged with *B*-methoxy-9-BBN (1.0 M solution in hexane, 3 mL, 3 mmol). The hexane was removed under reduced pressure and the borinic ester was dissolved in anhydrous Et<sub>2</sub>O (6 mL). The solution was cooled to -78 °C and allylmagnesium chloride (2 M solution in THF, 1.5 mL, 3 mmol) was added drop wise. The reaction mixture was warmed to room temperature and then stirred for 30 min followed by evaporation of the solvent. The resulting white solid was suspended in anhydrous hexane (9 mL) and stirred for 3 h at room temperature during which time the borane formed and the magnesium salt precipitated. After evaporation of the solvent dry Et<sub>2</sub>O (3 mL) was added and the suspension, containing the borane reagent, was cooled to -78 °C. The crude imine, synthesized following the imination procedure with ruthenium complex **1**, was dissolved in anhydrous Et<sub>2</sub>O (6 mL) and added drop wise to the borane solution. The reaction mixture was stirred at -78 °C for 1 h and then allowed to reach room temperature over night. A sample was taken out and analyzed by GCMS showing the complete conversion of the imine. The reaction was then quenched at 0 °C by addition of 37% hydrochloric acid (0.8 mL) and stirred for further 12 h at room temperature. Then 10% NaOH was added to the mixture until reaching pH 11, the organic phase was separated and the aqueous phase was extracted three times with Et<sub>2</sub>O (10 mL). The combined organic phases were dried over Na<sub>2</sub>SO<sub>4</sub> and concentrated at reduced pressure. A sample of the organic phase was taken out and analyzed by GCMS indicating the formation of the corresponding homoallylic amine<sup>8-10</sup> with a diastereomeric ratio of 90:10 (S,R/R,R). The crude amine was then subjected to column chromatography (hexane:Et<sub>2</sub>O, 9.5:0.5) to afford 134 mg of the pure diastereomeric mixture (53.4% yield over two steps).

### Determination of deuterium isotope effect

Benzyl alcohol (108 mg, 1 mmol) and *tert*-octylamine (129 mg, 1 mmol) were placed in an oven-dried Schlenk flask and subjected to the imination reaction following the general procedure with ruthenium complex **1**. The reaction mixture was refluxed with stirring for 1.5 h. Every 15 minutes the reaction mixture was cooled to room temperature and a sample of 50  $\mu$ L was taken out, transferred to a GC vial diluted to 1 mL with  $\text{CH}_2\text{Cl}_2$ , and then subjected to GCMS analysis to follow the formation of *N*-benzylidene-*tert*-octylamine. The same procedure was repeated using benzyl alcohol- $\alpha,\alpha\text{-}d_2$ <sup>12</sup> (110 mg, 1 mmol), *tert*-octylamine (129 mg, 1 mmol) and toluene- $d_8$  (1 mL) as solvent. In this case, before starting the reaction, the alcohol and the amine were dissolved in methanol- $d_4$  which was then evaporated (repeated twice). Each experiment was repeated four times and the initial rate (*r*) determined. The mean initial rate for the reaction of benzyl alcohol was  $r_{\text{H}} = 3.04 \cdot 10^{-5} \pm 0.56 \cdot 10^{-5}$ . The mean initial rate for the reaction of benzyl alcohol- $\alpha,\alpha\text{-}d_2$  was  $r_{\text{D}} = 2.72 \cdot 10^{-5} \pm 0.67 \cdot 10^{-5}$ . The isotope effect was  $k_{\text{H}}/k_{\text{D}} = 1.1 \pm 0.3$ .

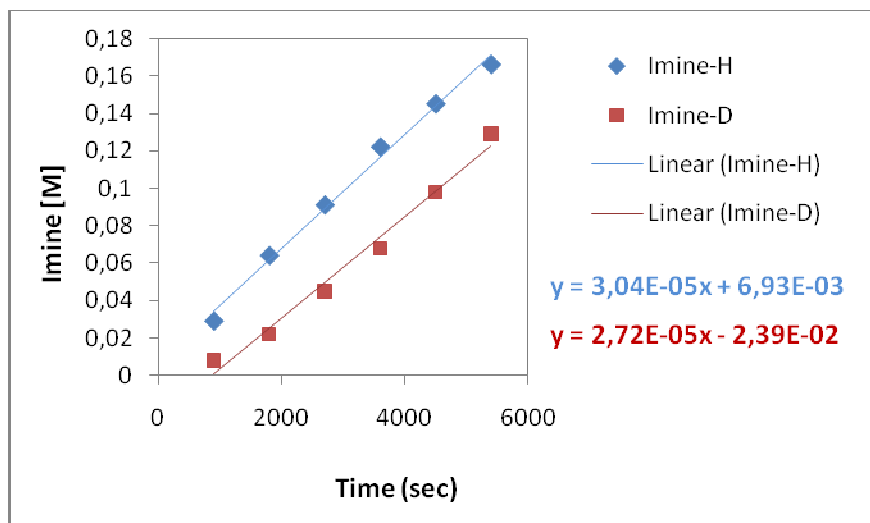

### Characterization data

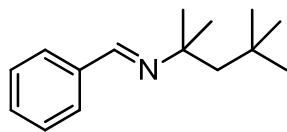

**N-benzylidene-*tert*-octylamine:** Following the imination procedure with ruthenium complex **1**, the imine was isolated as a light yellow oil (174 mg, 80% yield). **<sup>1</sup>H NMR** (300 MHz, CDCl<sub>3</sub>): δ 8.26 (s, 1H, N=CH), 7.78-7.75 (m, 2H, Ar), 7.43-7.40 (m, 3H, Ar), 1.72 (s, 2H, CH<sub>2</sub>), 1.35 (s, 6H, 2 × CH<sub>3</sub>), 0.98 (s, 9H, 3 × CH<sub>3</sub>); **<sup>13</sup>C NMR** (75 MHz, CDCl<sub>3</sub>): δ 154.3 (N=CH), 137.3 (Ar-quat-C), 129.9, 128.5, 127.8 (Ar), 60.9 (quat-C), 56.5 (CH<sub>2</sub>), 32.0 (quat-C), 31.8, 29.6 (CH<sub>3</sub>); NMR data are in accordance with literature values;<sup>13</sup> **GCMS** (EI, Pos): RT = 12.6 min; *m/z* 202 [M-CH<sub>3</sub>]<sup>+</sup>.

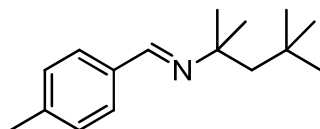

**N-(4-methylbenzylidene)-*tert*-octylamine:** Following the imination procedure with ruthenium complex **1**, the imine was isolated as a colorless oil (177 mg, 77% yield). **<sup>1</sup>H NMR** (300 MHz, CDCl<sub>3</sub>): δ 8.21 (s, 1H, N=CH), 7.64 (d, 2H, *J* = 8.1 Hz, Ar), 7.21 (d, 2H, *J* = 8.1 Hz, Ar), 2.38 (s, 3H, CH<sub>3</sub>), 1.69 (s, 2H, CH<sub>2</sub>), 1.32 (s, 6H, 2 × CH<sub>3</sub>), 0.96 (s, 9H, 3 × CH<sub>3</sub>); **<sup>13</sup>C NMR** (75 MHz, CDCl<sub>3</sub>): δ 154.2 (N=CH), 140.0 (Ar-quat-C), 134.8 (Ar-quat-C), 129.1, 127.8 (Ar), 60.8 (quat-C), 56.6 (CH<sub>2</sub>), 32.0 (quat-C), 31.7, 29.6, 21.4 (CH<sub>3</sub>); **GCMS** (EI, Pos): RT = 13.3 min, *m/z* 216 [M-CH<sub>3</sub>]<sup>+</sup>; **HRMS** (ESI, Pos): *m/z*: calcd for C<sub>16</sub>H<sub>26</sub>N: 232.2021 [M+H]<sup>+</sup>, found: 232.2059.

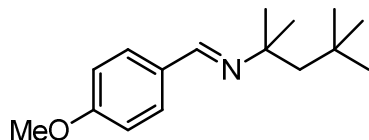

**N-(4-methoxybenzylidene)-*tert*-octylamine:** Following the imination procedure with ruthenium complex **1**, the imine was isolated as a colorless oil (155 mg, 63% yield). **<sup>1</sup>H NMR** (300 MHz, CDCl<sub>3</sub>): δ 8.18 (s, 1H, N=CH), 7.70 (d, 2H, *J* = 8.7 Hz, Ar), 6.93 (d, 2H, *J* = 8.7 Hz,

Ar), 3.84 (s, 3H, OCH<sub>3</sub>), 1.68 (s, 2H, CH<sub>2</sub>), 1.32 (s, 6H, 2 × CH<sub>3</sub>), 0.96 (s, 9H, 3 × CH<sub>3</sub>); <sup>13</sup>C NMR (75 MHz, CDCl<sub>3</sub>): δ 161.0 (Ar-quat-C), 153.6 (N=CH), 130.4 (Ar-quat-C), 129.3, 113.8 (Ar), 60.6 (quat-C), 56.6 (CH<sub>2</sub>), 55.3 (OCH<sub>3</sub>), 32.0 (quat-C), 31.8, 29.7 (CH<sub>3</sub>); GCMS (EI, Pos): RT = 14.2 min, *m/z* 232 [M-CH<sub>3</sub>]<sup>+</sup>; HRMS (ESI, Pos): *m/z*: calcd for C<sub>16</sub>H<sub>26</sub>NO: 248.1970 [M+H]<sup>+</sup>, found: 248.2010.

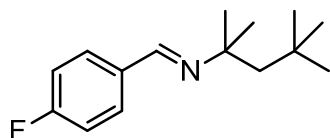

***N*-(4-fluorobenzylidene)-*tert*-octylamine:** Following the imination procedure with ruthenium complex **1**, the imine was isolated as a colorless oil (168 mg, 72% yield). <sup>1</sup>H NMR (300 MHz, CDCl<sub>3</sub>): δ 8.21 (s, 1H, N=CH), 7.76-7.70 (m, 2H, Ar), 7.10 (bt, 2H, Ar), 1.69 (s, 2H, CH<sub>2</sub>), 1.32 (s, 6H, 2 × CH<sub>3</sub>), 0.96 (s, 9H, 3 × CH<sub>3</sub>); <sup>13</sup>C NMR (75 MHz, CDCl<sub>3</sub>): δ 163.8 (d, *J*<sub>C-F</sub> = 248.0 Hz, Ar-quat-C), 152.9 (N=CH), 133.6 (d, *J*<sub>C-F</sub> = 2.85 Hz, Ar-quat-C), 129.6 (d, *J*<sub>C-F</sub> = 8.4 Hz, Ar), 115.5 (d, *J*<sub>C-F</sub> = 21.6 Hz, Ar), 60.9 (quat-C), 56.5 (CH<sub>2</sub>), 32.0 (quat-C), 31.7, 29.6 (CH<sub>3</sub>); GCMS (EI, Pos): RT = 12.5 min, *m/z* 220 [M-CH<sub>3</sub>]<sup>+</sup>; HRMS (ESI, Pos): *m/z*: calcd for C<sub>15</sub>H<sub>23</sub>FN: 236.1770 [M+H]<sup>+</sup>, found: 236.1809.

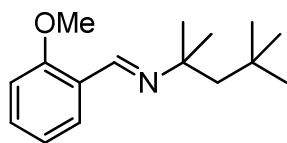

***N*-(2-methoxybenzylidene)-*tert*-octylamine:** Following the imination procedure with ruthenium complex **1**, the imine was isolated as a colorless oil (170 mg, 69% yield). <sup>1</sup>H NMR (300 MHz, CDCl<sub>3</sub>): δ 8.67 (s, 1H, N=CH), 7.96 (bd, 1H, Ar), 7.35 (bt, 1H, Ar), 6.98 (bt, 1H, Ar), 6.91 (bd, 1H, Ar), 3.87 (s, 3H, OCH<sub>3</sub>), 1.70 (s, 2H, CH<sub>2</sub>), 1.33 (s, 6H, 2 × CH<sub>3</sub>), 0.96 (s, 9H, 3 × CH<sub>3</sub>); <sup>13</sup>C NMR (75 MHz, CDCl<sub>3</sub>): δ 158.6 (Ar-quat-C), 150.4 (N=CH), 131.0, 127.0 (Ar), 125.8 (Ar-quat-C), 120.8, 110.8 (Ar), 61.3 (quat-C), 56.6 (CH<sub>2</sub>), 55.4 (OCH<sub>3</sub>), 32.0 (quat-C), 31.8, 29.8 (CH<sub>3</sub>); GCMS (EI, Pos): RT = 13.8 min, *m/z* 232 [M-CH<sub>3</sub>]<sup>+</sup>; HRMS (ESI, Pos): *m/z*: calcd for C<sub>16</sub>H<sub>26</sub>NO: 248.1970 [M+H]<sup>+</sup>, found: 248.2008.

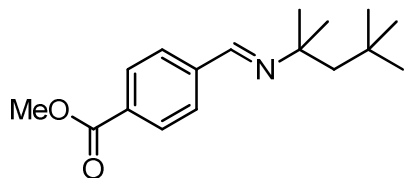

***N*-(4-carbomethoxybenzylidene)-*tert*-octylamine:** Following the imination procedure with ruthenium complex **1**, the imine was isolated as a light yellow solid (162 mg, 59% yield). **<sup>1</sup>H NMR** (300 MHz, CDCl<sub>3</sub>): δ 8.27 (s, 1H, N=CH), 8.07 (d, 2H, *J* = 8.1 Hz, Ar), 7.80 (d, 2H, *J* = 8.1 Hz, Ar), 3.93 (s, 3H, OCH<sub>3</sub>), 1.70 (s, 2H, CH<sub>2</sub>), 1.33 (s, 6H, 2 × CH<sub>3</sub>), 0.95 (s, 9H, 3 × CH<sub>3</sub>); **<sup>13</sup>C NMR** (75 MHz, CDCl<sub>3</sub>): δ 166.8 (C=O), 153.5 (N=CH), 141.2, 131.1 (Ar-quat-C), 129.7, 127.7 (Ar), 61.5 (quat-C), 56.5 (CH<sub>2</sub>), 52.2 (OCH<sub>3</sub>), 32.0 (quat-C), 31.7, 29.5 (CH<sub>3</sub>); **GCMS** (EI, Pos): RT = 15.1 min, *m/z* 260 [M-CH<sub>3</sub>]<sup>+</sup>; **HRMS** (ESI, Pos): *m/z*: calcd for C<sub>17</sub>H<sub>26</sub>NO<sub>2</sub>: 276.1919 [M+H]<sup>+</sup>, found: 276.1960.

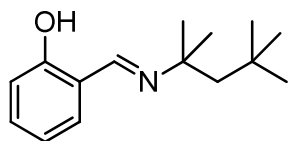

***N*-(2-hydroxybenzylidene)-*tert*-octylamine:** Following the imination procedure with ruthenium complex **1**, the imine was isolated as an intense yellow oil (77 mg, 33% yield). **<sup>1</sup>H NMR** (300 MHz, CDCl<sub>3</sub>): δ 8.23 (s, 1H, N=CH), 7.24-7.16 (m, 2H, Ar), 6.86 (d, 1H, *J* = 7.8 Hz, Ar), 6.77 (td, 1H, *J*<sub>1</sub> = 7.5, *J*<sub>2</sub> = 0.9, Ar), 1.64 (s, 2H, CH<sub>2</sub>), 1.30 (s, 6H, 2 × CH<sub>3</sub>), 0.88 (s, 9H, 3 × CH<sub>3</sub>); **<sup>13</sup>C NMR** (75 MHz, CDCl<sub>3</sub>): δ 162.2 (Ar-quat-C), 159.5 (N=CH), 131.9, 131.2 (Ar), 118.8 (Ar-quat-C), 117.9, 117.3 (Ar), 60.5 (quat-C), 56.2 (CH<sub>2</sub>), 31.9 (quat-C), 31.6, 29.4 (CH<sub>3</sub>); **GCMS** (EI, Pos): RT = 13.8 min, *m/z* 218 [M-CH<sub>3</sub>]<sup>+</sup>; **HRMS** (ESI, Pos): *m/z*: calcd for C<sub>15</sub>H<sub>24</sub>NO: 234.1813 [M+H]<sup>+</sup>, found: 234.1854.

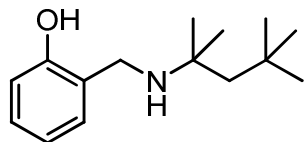



**2-hydroxybenzyl-*tert*-octylamine:** Following the imination procedure with ruthenium complex **1**, the amine was isolated as a light brown oil (88 mg, 37% yield). **<sup>1</sup>H NMR** (300 MHz, CDCl<sub>3</sub>): δ 7.15 (bt, 1H, Ar), 7.00 (bd, 1H, Ar), 6.84-6.74 (m, 2H, 2 × Ar), 3.94 (s, 2H, CH<sub>2</sub>), 1.54 (s, 2H, CH<sub>2</sub>), 1.26 (s, 6H, 2 × CH<sub>3</sub>), 1.04 (s, 9H, 3 × CH<sub>3</sub>); **<sup>13</sup>C NMR** (75 MHz, CDCl<sub>3</sub>): δ 158.3 (Ar-quat-C), 128.5, 127.9 (Ar), 123.5 (Ar-quat-C), 118.8, 116.4 (Ar), 54.3 (quat-C), 53.4, 45.6 (CH<sub>2</sub>), 31.7 (CH<sub>3</sub>), 31.6 (quat-C), 28.2 (CH<sub>3</sub>); **HRMS** (ESI, Pos): *m/z*: calcd for C<sub>15</sub>H<sub>26</sub>NO: 236.1936 [M+H]<sup>+</sup>, found: 236.2009.

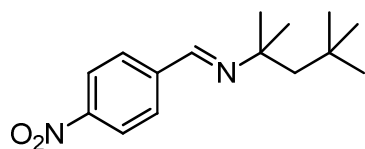

***N*-(4-nitrobenzylidene)-*tert*-octylamine:** Following the imination procedure with ruthenium complex **1**, the imine was isolated as a light brown oil (126 mg, 48% yield). **<sup>1</sup>H NMR** (300 MHz, CDCl<sub>3</sub>): δ 8.30 (s, 1H, N=CH), 8.26 (d, 2H, *J* = 8.7 Hz, Ar), 7.91 (d, 2H, *J* = 8.7 Hz, Ar), 1.71 (s, 2H, CH<sub>2</sub>), 1.34 (s, 6H, 2 × CH<sub>3</sub>), 0.94 (s, 9H, 3 × CH<sub>3</sub>); **<sup>13</sup>C NMR** (75 MHz, CDCl<sub>3</sub>): δ 152.3 (N=CH), 142.7 (Ar-quat-C), 128.5, 123.8 (Ar), 61.9 (quat-C), 56.5 (CH<sub>2</sub>), 32.0 (quat-C), 31.7, 29.5 (CH<sub>3</sub>); **GCMS** (EI, Pos): RT = 15.2 min, *m/z* 247 [M-CH<sub>3</sub>]<sup>+</sup>; **HRMS** (ESI, Pos): *m/z*: calcd for C<sub>15</sub>H<sub>23</sub>N<sub>2</sub>O<sub>2</sub>: 263.1715 [M+H]<sup>+</sup>, found: 263.1753.

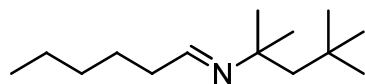

***N*-hexylidene-*tert*-octylamine:** Following the imination procedure with ruthenium complex **1**, the imine was isolated as a yellow oil (84 mg, 40% yield). **<sup>1</sup>H NMR** (300 MHz, CDCl<sub>3</sub>): δ 7.55 (t, 1H, *J* = 4.8, N=CH), 2.25-2.19 (m, 2H, CH<sub>2</sub>), 1.59 (s, 2H, CH<sub>2</sub>), 1.52-1.45 (m, 2H, CH<sub>2</sub>), 1.32-1.28 (m, 4H, 2 × CH<sub>2</sub>), 1.18 (s, 6H, 2 × CH<sub>3</sub>), 0.91 (bs, 12H, 4 × CH<sub>3</sub>); **<sup>13</sup>C NMR** (75 MHz, CDCl<sub>3</sub>): δ 158.6 (N=CH), 60.3 (quat-C), 55.8 (CH<sub>2</sub>), 36.4 (CH<sub>2</sub>), 32.0 (quat-C), 31.7 (CH<sub>3</sub>), 30.0 (CH<sub>3</sub>), 29.2, 25.9, 22.5 (CH<sub>2</sub>), 14.0 (CH<sub>3</sub>); **GCMS** (EI, Pos): RT = 11.1 min, *m/z* 196 [M-CH<sub>3</sub>]<sup>+</sup>.

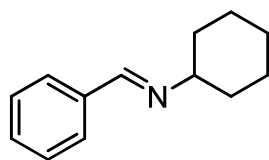

**N-benzylidenecyclohexylamine:** Following the imination procedure with ruthenium complex **1**, the imine was isolated as a yellow oil (113 mg, 60% yield).  $^1\text{H NMR}$  (300 MHz,  $\text{CDCl}_3$ ):  $\delta$  8.32 (s, 1H, N=CH), 7.75-7.71 (m, 2H, Ar), 7.41-7.39 (m, 3H, Ar), 3.24-3.15 (m, 1H, CH), 1.87-1.54 (m, 8H, 4  $\times$   $\text{CH}_2$ ), 1.44-1.26 (m, 2H,  $\text{CH}_2$ );  $^{13}\text{C NMR}$  (75 MHz,  $\text{CDCl}_3$ ):  $\delta$  158.6 (N=CH), 136.5 (Ar-quat-C), 130.3, 128.5, 127.9 (Ar), 70.0 (CH), 34.3, 25.6, 24.8 ( $\text{CH}_2$ ); NMR data are in accordance with literature values;<sup>14</sup> **GCMS** (EI, Pos): RT = 12.8 min,  $m/z$  187  $[\text{M}]^+$ .

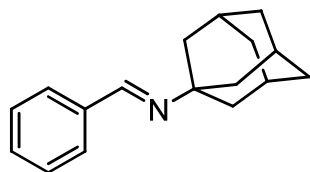

**N-benzylidene-1-adamantanyllamine:** Following the imination procedure with ruthenium complex **1**, the imine was isolated as a white solid (169 mg, 70% yield).  $^1\text{H NMR}$  (300 MHz,  $\text{CDCl}_3$ ):  $\delta$  8.28 (s, 1H, N=CH), 7.77-7.74 (m, 2H, 2  $\times$  Ar), 7.41-7.38 (m, 3H, 3  $\times$  Ar), 2.18 (bs, 3H, 3  $\times$  CH), 1.82 (bd, 6H, 3  $\times$   $\text{CH}_2$ ), 1.73 (bs, 6H, 3  $\times$   $\text{CH}_2$ );  $^{13}\text{C NMR}$  (75 MHz,  $\text{CDCl}_3$ ):  $\delta$  154.8 (N=CH), 137.2 (Ar-quat-C), 130.1, 128.4, 127.8 (Ar), 57.4 (quat-C), 43.1, 36.5, 29.5 (aliphatic -C); NMR data are in accordance with literature values;<sup>15</sup> **GCMS** (EI, Pos): RT = 15.6 min,  $m/z$  239  $[\text{M}]^+$ .

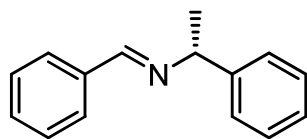

**(R)-N-benzylidene-1-phenylethylamine:** Following the imination procedure with ruthenium complex **1**, the imine was isolated as a light yellow oil (132 mg, 63% yield).  $[\alpha]_{\text{D}}^{20} = -64.6$  ( $c = 1.6$  g,  $\text{CHCl}_3$ ) (ref.<sup>16</sup>  $[\alpha]_{\text{D}}^{27} = -64.7$  ( $c = 1.0$ ,  $\text{CHCl}_3$ ));  $^1\text{H NMR}$  (300 MHz,  $\text{CDCl}_3$ ):  $\delta$  8.30 (s,

1H, N=CH), 7.72-7.69 (m, 2H, 2 × Ar), 7.34-7.24 (m, 8H, 8 × Ar), 4.47 (q, 1H,  $J = 6.6$  Hz, CH), 1.52 (d, 3H,  $J = 6.6$  Hz, CH<sub>3</sub>); <sup>13</sup>C NMR (75 MHz, CDCl<sub>3</sub>): δ 159.4 (N=C), 145.1, 136.4 (Ar-quat-C), 130.5, 128.5, 128.4, 126.8, 126.6 (Ar), 69.7 (CH), 24.8 (CH<sub>3</sub>); NMR data are in accordance with literature values;<sup>16</sup> GCMS (EI, Pos): RT = 13.9 min,  $m/z$  209 [M]<sup>+</sup>.

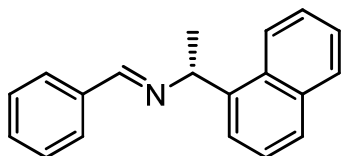

**(R)-N-benzylidene-1-(1-naphthyl)ethylamine:** Following the imination procedure with ruthenium complex **1**, the imine was isolated as an orange solid (133.4 mg, 51.5% yield).  $[\alpha]_D^{20} = -242.0$  ( $c = 1.1$ , CHCl<sub>3</sub>) (ref.<sup>16</sup>  $[\alpha]_D^{15} = -250.3$  ( $c = 1.04$ , CHCl<sub>3</sub>)); <sup>1</sup>H NMR (300 MHz, CDCl<sub>3</sub>): δ 8.45 (s, 1H, N=CH), 8.28 (d, 1H,  $J = 8.4$  Hz, Ar), 7.91-7.67 (m, 5H, 5 × Ar), 7.58-7.48 (m, 3H, 3 × Ar), 7.44-7.42 (m, 3H, 3 × Ar), 5.38 (q, 1H,  $J = 6.6$  Hz, CH), 1.76 (d, 3H,  $J = 6.6$  Hz, CH<sub>3</sub>); <sup>13</sup>C NMR (75 MHz, CDCl<sub>3</sub>): δ 159.6 (N=CH), 141.1, 136.4, 133.9, 130.6 (Ar-quat-C), 130.5, 128.9, 128.5, 128.2, 127.3, 125.7, 125.6, 125.3, 123.9, 123.6 (Ar), 65.5 (CH), 24.5 (CH<sub>3</sub>); NMR data are in accordance with literature values;<sup>16</sup> GCMS (EI, Pos): RT = 16.8 min,  $m/z$  259 [M]<sup>+</sup>.

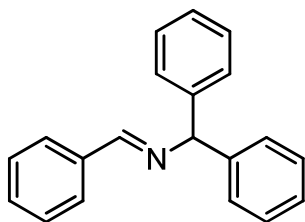

**N-benzylidene-1,1-diphenylmethanamine:** Following the imination procedure with ruthenium complex **1**, the imine was isolated as a white solid (108 mg, 40% yield). <sup>1</sup>H NMR (300 MHz, CDCl<sub>3</sub>): δ 8.34 (s, 1H, N=CH), 7.78-7.74 (m, 2H, 2 × Ar), 7.34-7.31 (m, 7H, 7 × Ar), 7.26-7.21 (bt, 4H, 4 × Ar), 7.17-7.12 (m, 2H, 2 × Ar), 5.51 (s, 1H, CH); <sup>13</sup>C NMR (75 MHz, CDCl<sub>3</sub>): δ 160.7 (N=CH), 143.8, 136.2, 130.7, 128.5, 128.4, 128.4, 127.6, 126.9 (Ar), 77.8 (CH); NMR data are in accordance with literature values;<sup>17</sup> GCMS (EI, Pos): RT = 16.8 min,  $m/z$  271 [M]<sup>+</sup>.

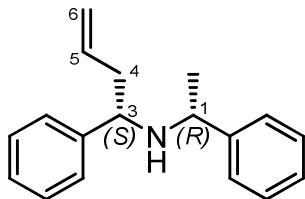

**(S)-1-phenyl-N-((R)-1-phenylethyl)but-3-en-1-yl-amine:** Following the procedure for addition of *B*-allyl-9-BBN to (*R*)-*N*-benzylidene-1-phenylethylamine, the pure S,R diastereomer was isolated as a light yellow oil (99 mg, 39 % yield).  $[\alpha]_D^{20} = +3.6$  ( $c = 1.1$ ,  $\text{CHCl}_3$ );  $^1\text{H NMR}$  (300 MHz,  $\text{CDCl}_3$ ):  $\delta$  7.25-7.12 (m, 10H, Ar), 5.66-5.33 (m, 1H, CH-5), 4.98-4.91 (m, 2H,  $\text{CH}_2$ -6), 3.69 (t, 1H,  $J = 6.6$  Hz, CH-3), 3.64 (q, 1H,  $J = 6.6$  Hz, CH-1), 2.37 (bq, 2H,  $\text{CH}_2$ -4), 1.53 (s, 1H, NH), 1.25 (d, 3H,  $J = 6.6$  Hz,  $\text{CH}_3$ );  $^{13}\text{C NMR}$  (75 MHz,  $\text{CDCl}_3$ ):  $\delta$  146.0, 143.9 (Ar-quat), 135.4 (CH-5), 128.3, 128.2, 127.1, 126.8, 126.7, 126.5 (Ar), 117.2 ( $\text{CH}_2$ -6), 59.6, 54.5 (CH-1, CH-3), 42.1 ( $\text{CH}_2$ -4), 22.5 ( $\text{CH}_3$ ); NMR data are in accordance with literature values;<sup>8,9</sup> **GCMS** (EI, Pos): RT = 14.4 min,  $m/z$  236  $[\text{M}-\text{CH}_3]^+$ .

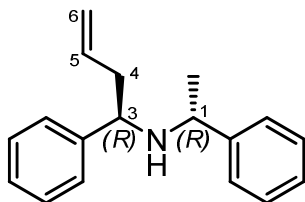

**(R)-1-phenyl-N-((R)-1-phenylethyl)but-3-en-1-yl-amine:**<sup>9</sup> Following the procedure for addition of allylmetal reagents to (*R*)-*N*-benzylidene-1-phenylethylamine, the R,R diastereomer was isolated in mixture with the S,R diastereomer. The reported  $^1\text{H NMR}$  signals were deduced from one of the most enriched chromatographic fractions. While  $^{13}\text{C NMR}$  signals were deduced from the spectra of the diastereomeric mixture.  $^1\text{H NMR}$  (300 MHz,  $\text{CDCl}_3$ ):  $\delta$  7.27-7.07 (m, 10H, Ar), 5.67-5.48 (m, 1H, CH-5), 5.00-4.91 (m, 2H,  $\text{CH}_2$ -6), 3.41 (q, 1H,  $J = 6.6$  Hz, CH-1), 3.30 (t, 1H,  $J = 6.9$  Hz, CH-3), 2.25 (bt, 2H,  $\text{CH}_2$ -4), 1.62 (bs, 1H, NH), 1.19 (d, 3H,  $J = 6.6$  Hz,  $\text{CH}_3$ );  $^{13}\text{C NMR}$  (75 MHz,  $\text{CDCl}_3$ ):  $\delta$  145.7, 144.2 (Ar-quat), 135.6 (CH-5), 128.3, 128.3, 127.2, 126.8, 126.7, 126.5 (Ar), 117.3 ( $\text{CH}_2$ -6), 58.9, 54.8 (CH-1, CH-3), 43.3 ( $\text{CH}_2$ -4), 24.8 ( $\text{CH}_3$ );

$^{13}\text{C}$  NMR data in accordance with literature values;<sup>10</sup> GCMS (EI, Pos): RT = 14.2 min,  $m/z$  236  $[\text{M}-\text{CH}_3]^+$ .

## References

- 1) Herrmann, W. H.; Köcher, C.; Goossen, L. J.; Artus, G. R. J. *Chem. Eur. J.* **1996**, *2*, 1627-1637.
- 2) Mistryukov, E. A. *Mendeleev Commun.* **2006**, *16*, 258-259.
- 3) Dam, J. H.; Osztrovszky, G.; Nordstrøm, L. U.; Madsen, R. *Chem. Eur. J.* **2010**, *16*, 6820-6827.
- 4) Chen, W.; Liu, F. *J. Organomet. Chem.* **2003**, *673*, 5-12.
- 5) Zhang, Y.; Chen, C.; Ghosh, S. C.; Li, Y.; Hong, S. H. *Organometallics* **2010**, *29*, 1374-1378.
- 6) Felpin, F. X.; Fouquet, E. *Chem. Eur. J.* **2010**, *16*, 12440-12445.
- 7) Taniguchi, M.; Oshima, K.; Utimoto, K. *Bull. Chem. Soc. Jpn.* **1995**, *68*, 645-653.
- 8) Cimarelli, C.; Palmieri, G.; Volpini, E. *Tetrahedron: Asymmetry* **2002**, *13*, 2011-2018.
- 9) Alvaro, G.; Boga, C.; Savoia, D.; Umani-Ronchi, A. *J. Chem. Soc., Perkin Trans. I* **1996**, 875-882.
- 10) Pachamuthu, K.; Vankar, Y. D. *J. Organomet. Chem.* **2001**, *624*, 359-363.
- 11) Fang, G. Y.; Wallner, O. A.; Di Blasio, N.; Ginesta, X.; Harvey, J. N.; Aggarwal, V. K. *J. Am. Chem. Soc.* **2007**, *129*, 14632-14639.
- 12) Barluenga, J.; Fañanás, F. J.; Sanz, R.; Marcos, C.; Trabada, M. *Org. Lett.* **2002**, *4*, 1587-1590.
- 13) Alender, J.; Morgan, P.; Timberlake, J. *J. Org. Chem.* **1983**, *48*, 755-758.
- 14) Pelletier, G.; Bechara, W. S.; Charette, A. B. *J. Am. Chem. Soc.* **2010**, *132*, 12817-12819.
- 15) Cliffe, I. A.; Crossley, R.; Shepherd, R. G. *Synthesis* **1985**, 1138-1140.
- 16) Yamada, H.; Kawate, T.; Nishida, A.; Nakagawa, M. *J. Org. Chem.* **1999**, *64*, 8821-8828.
- 17) Vyas, D. J.; Fröhlich, R.; Oestreich, M. *Org. Lett.* **2011**, *13*, 2094-2097.

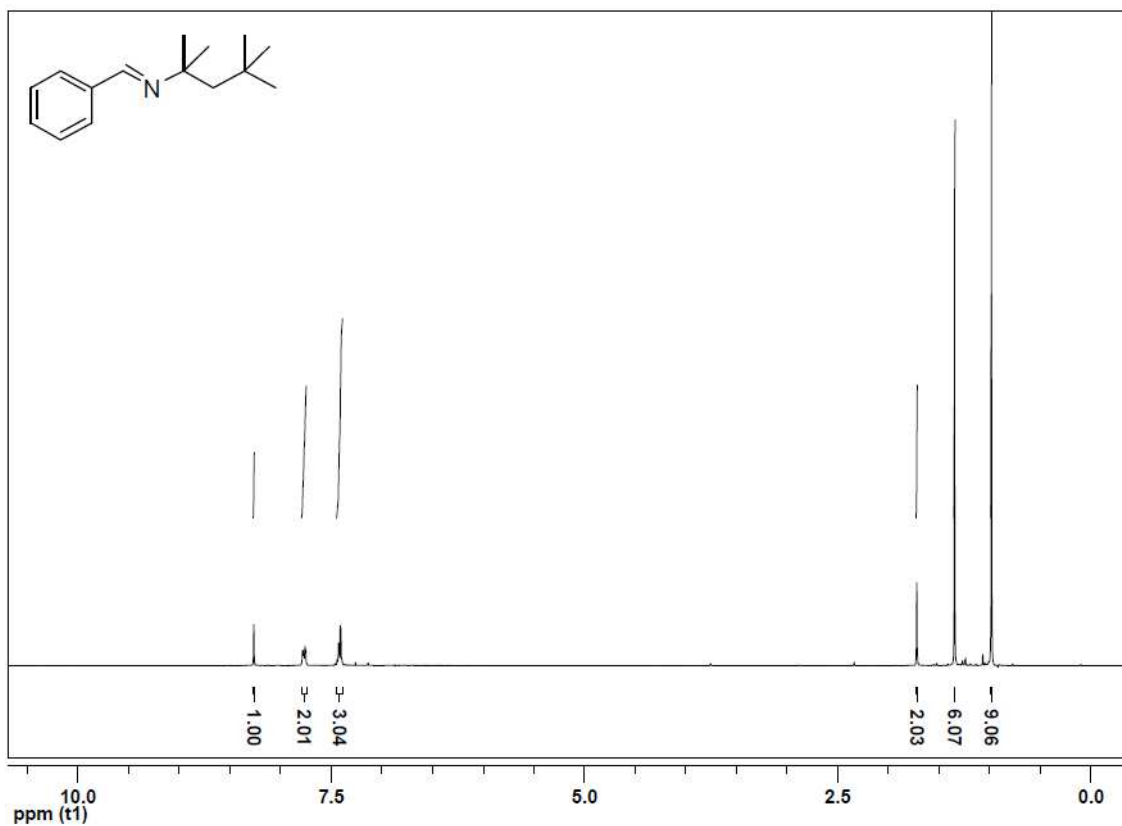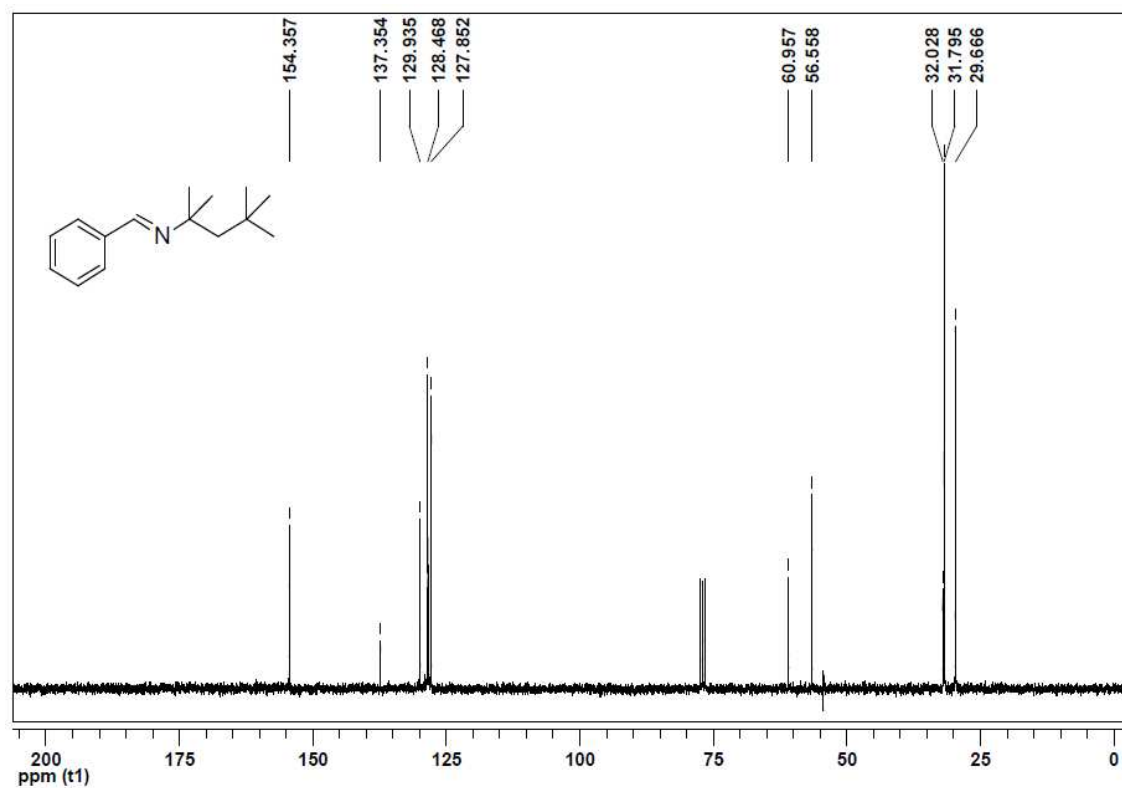

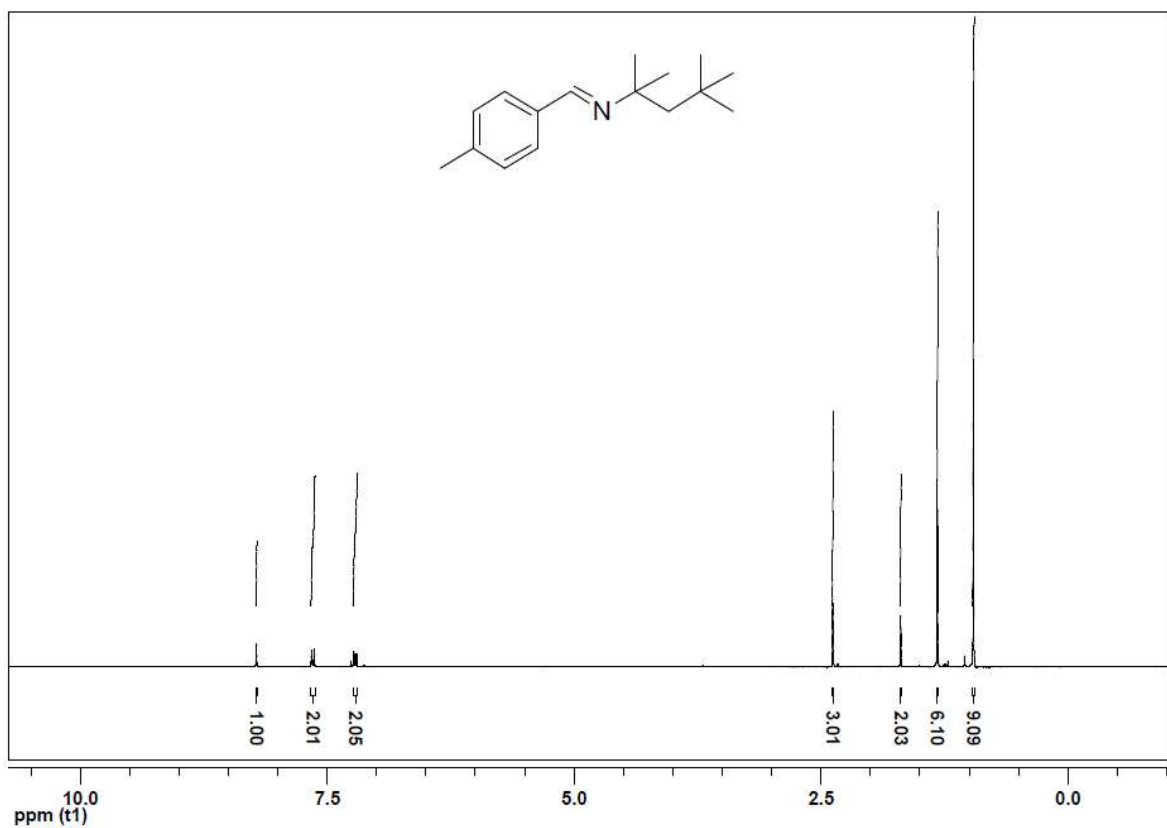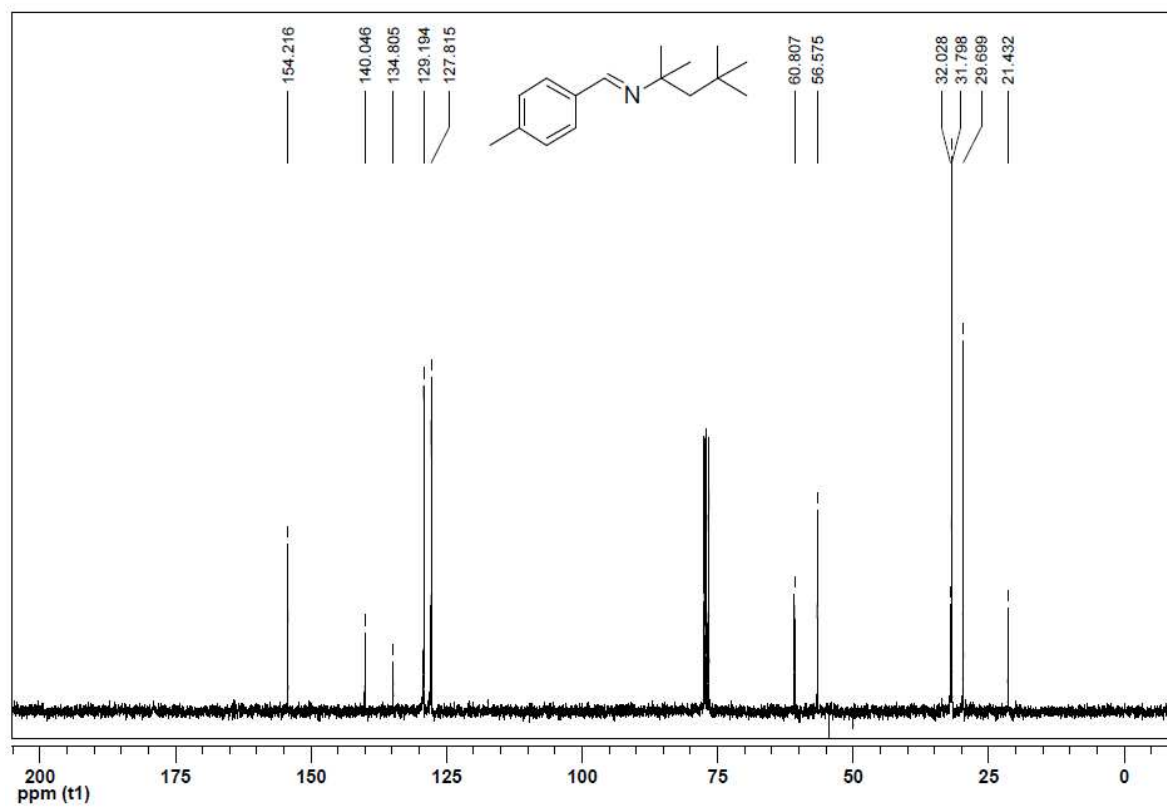

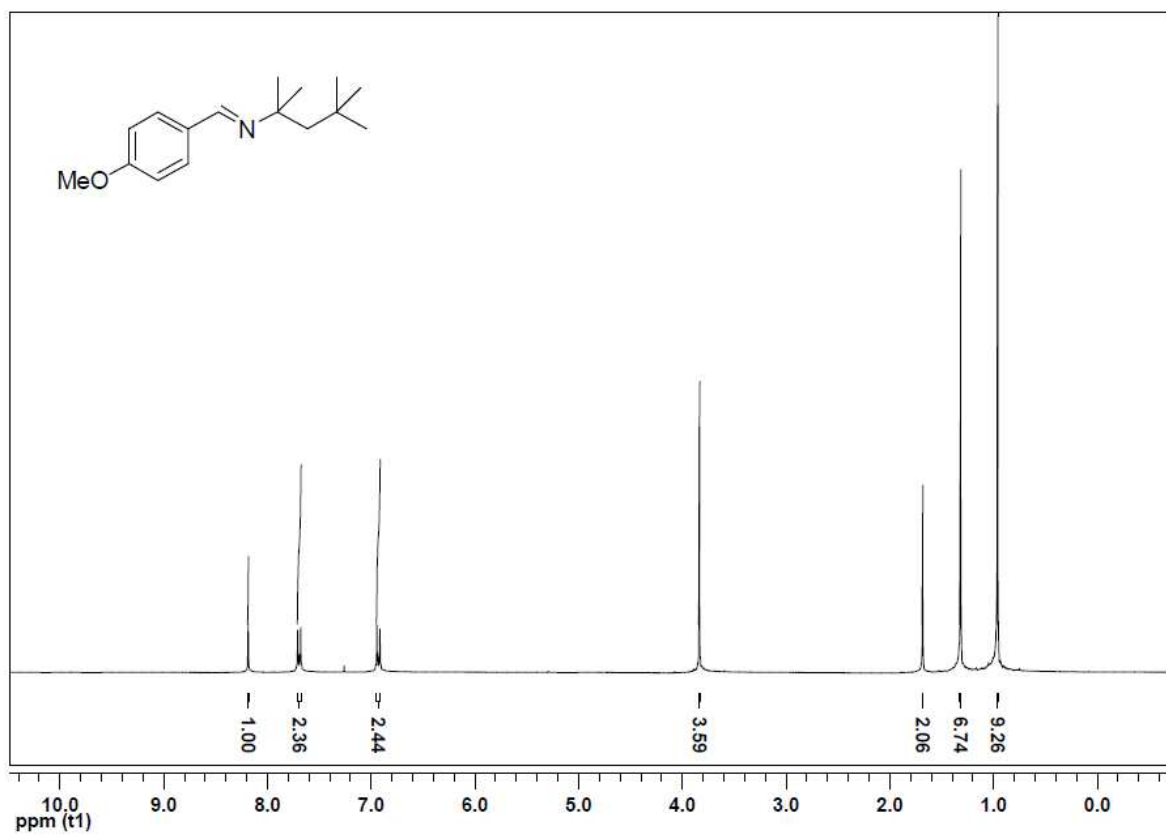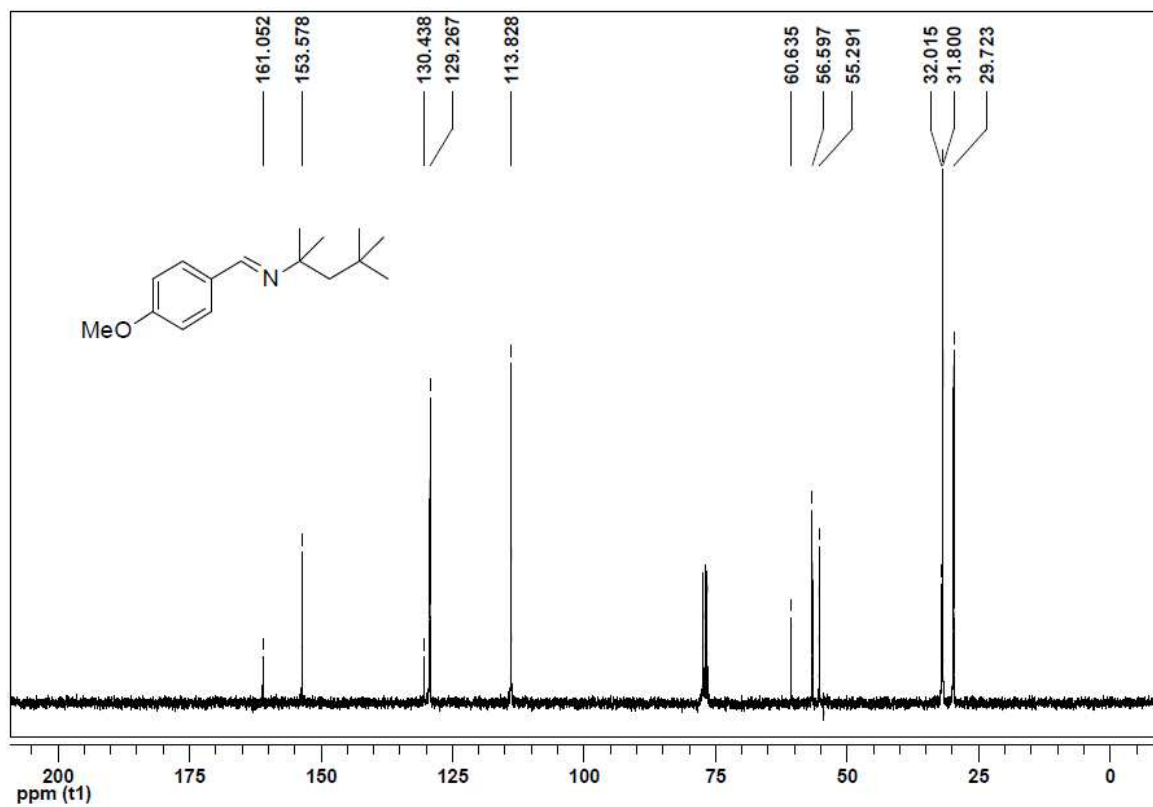



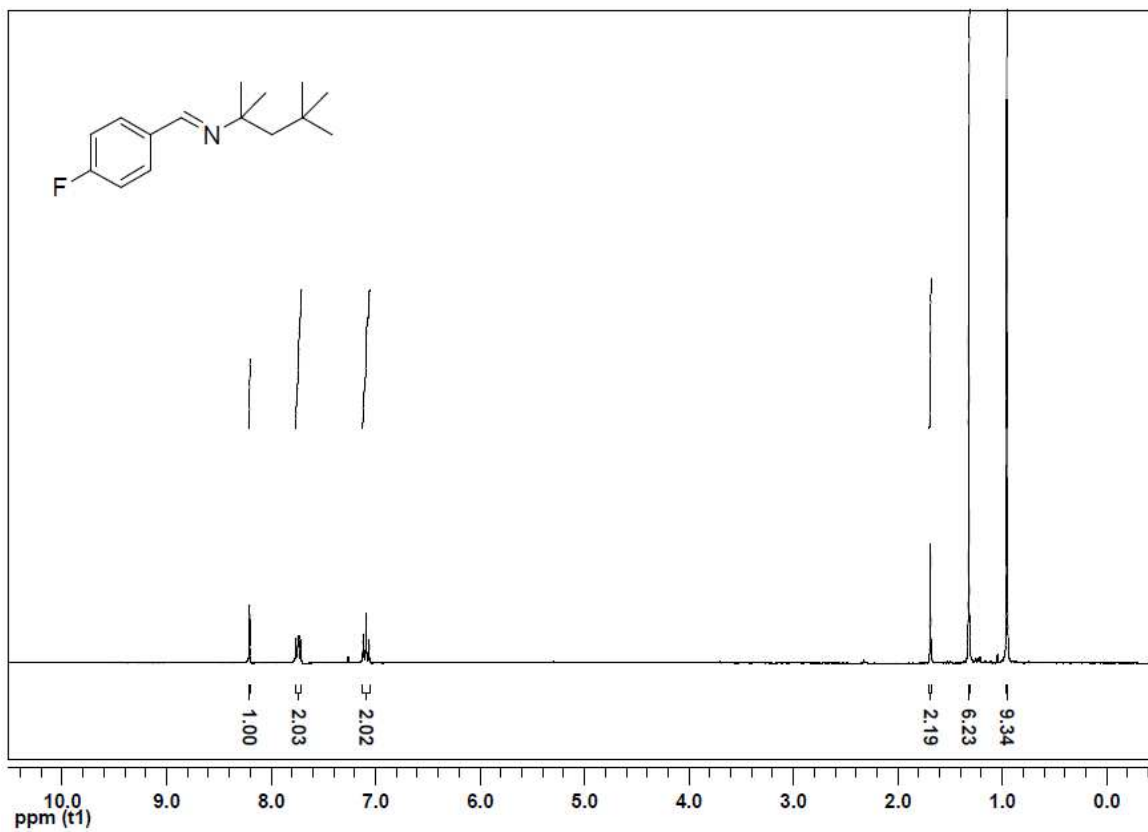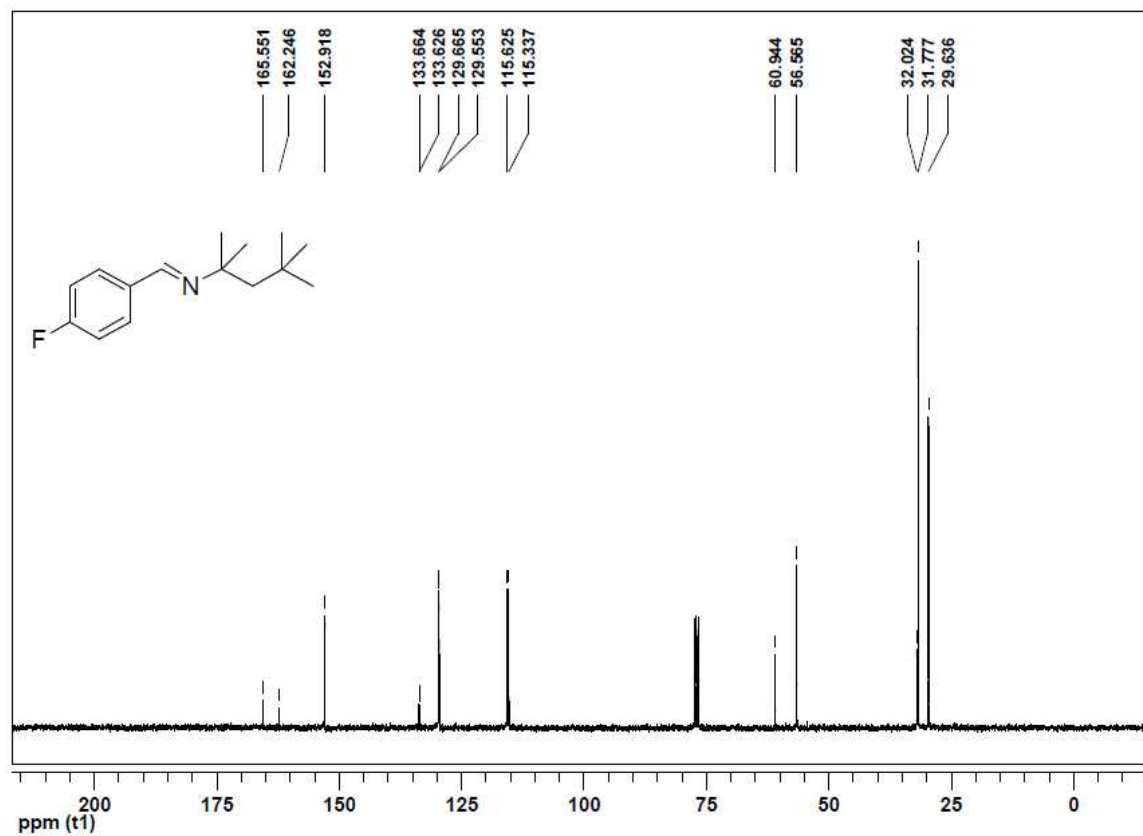

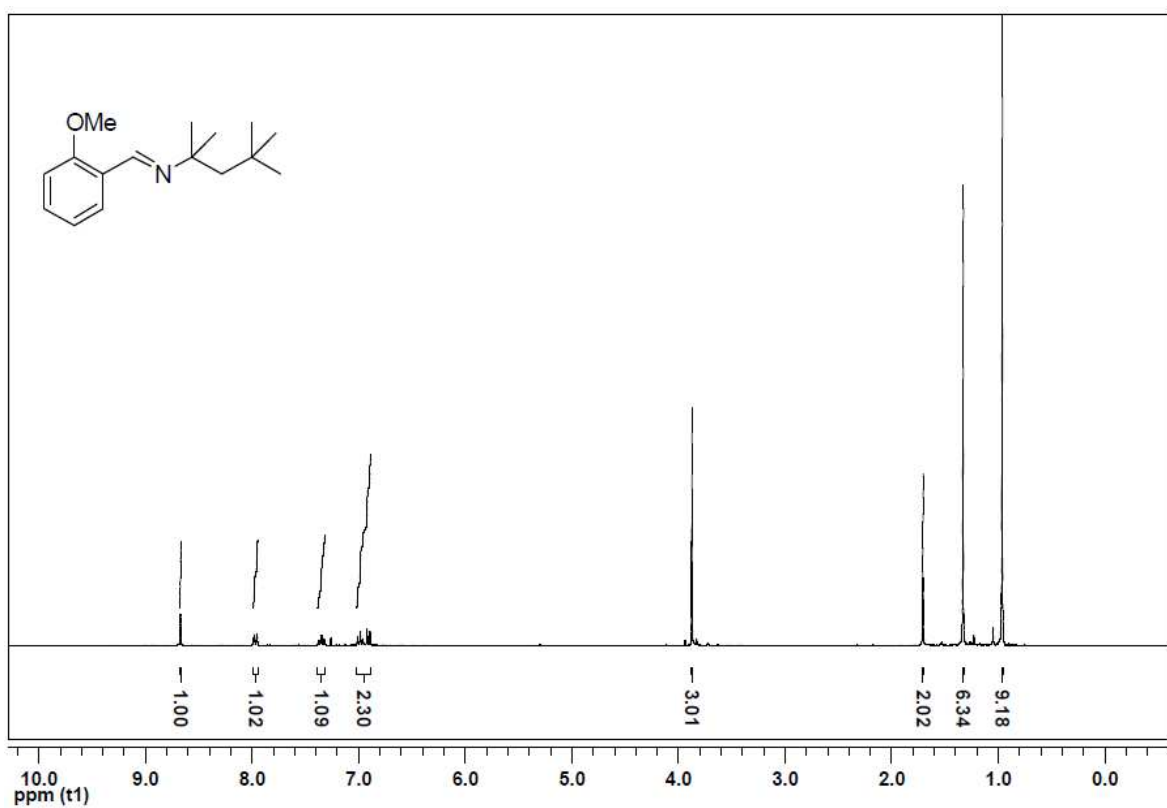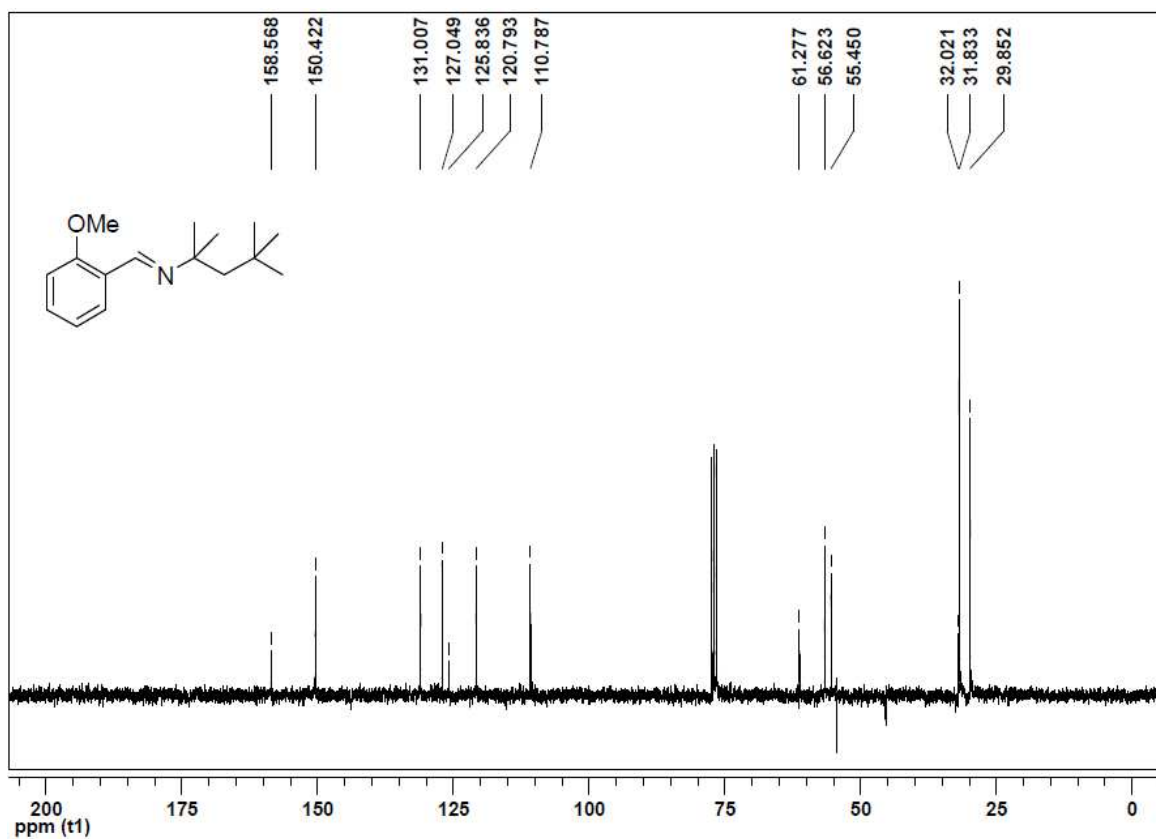

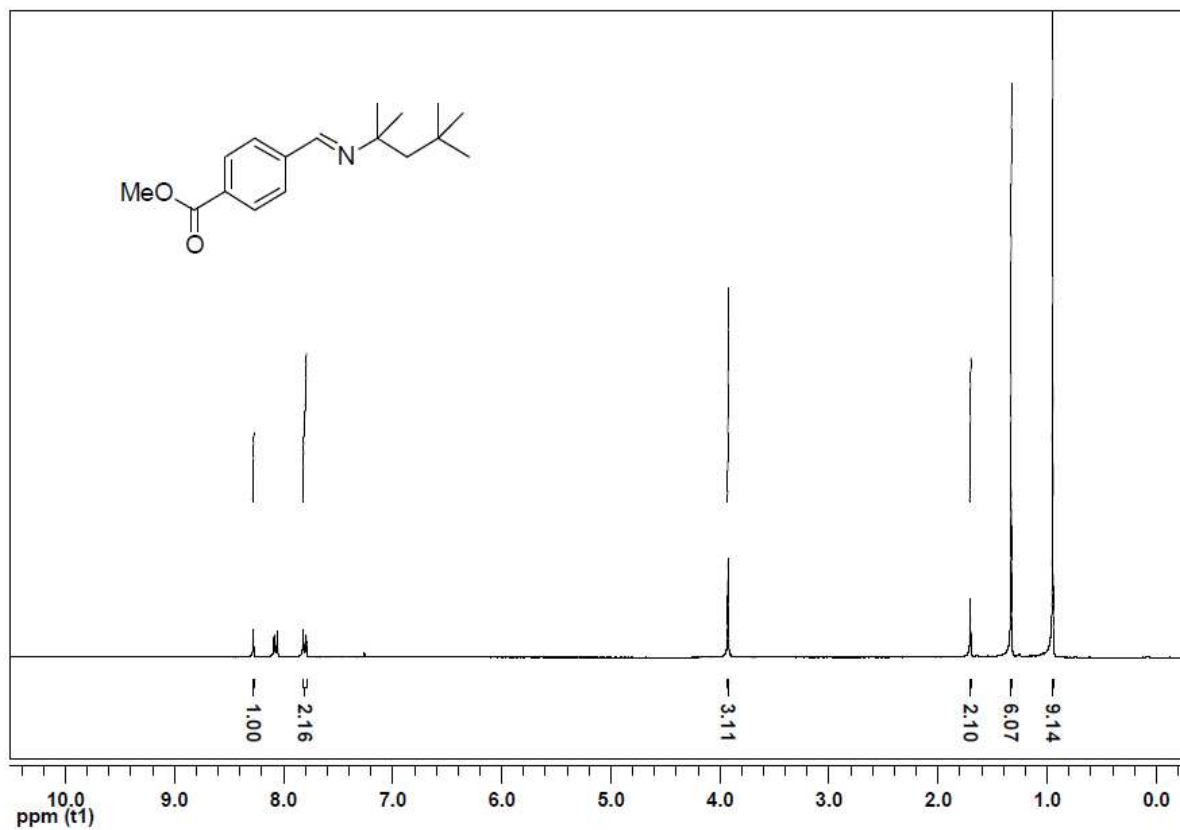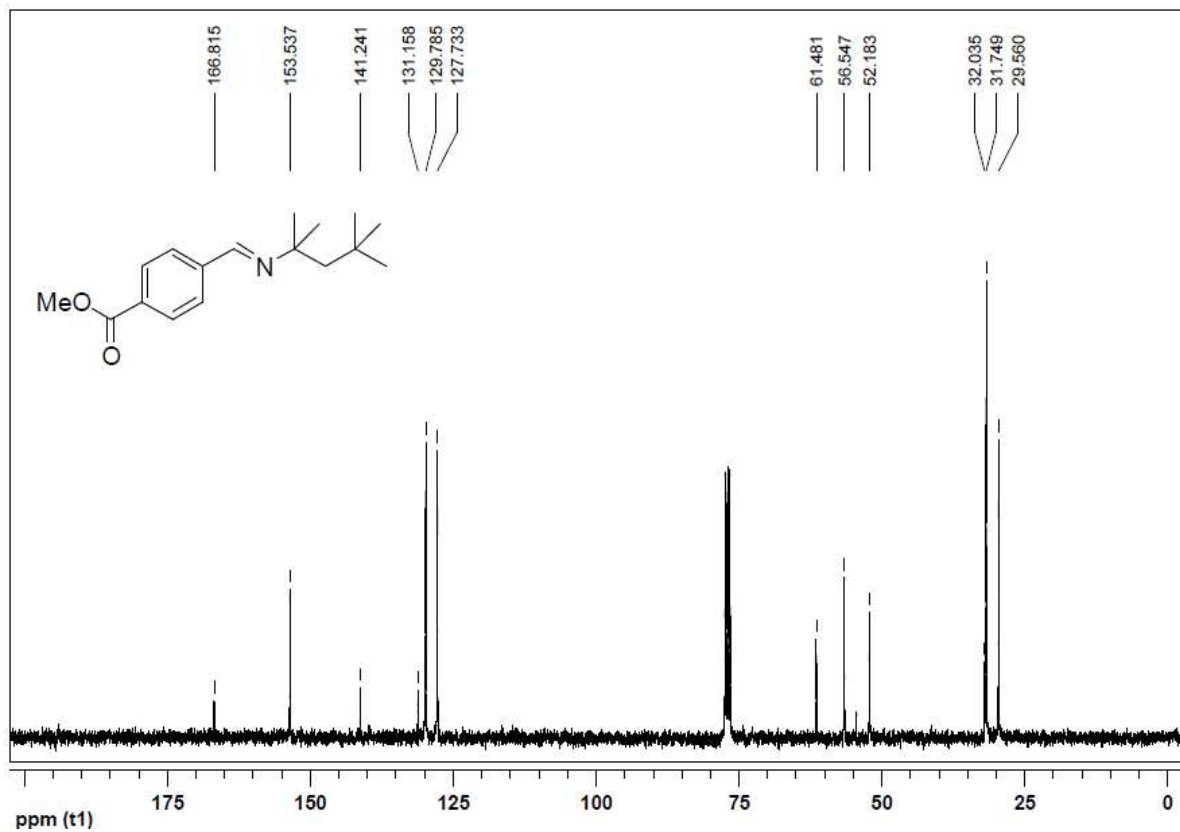

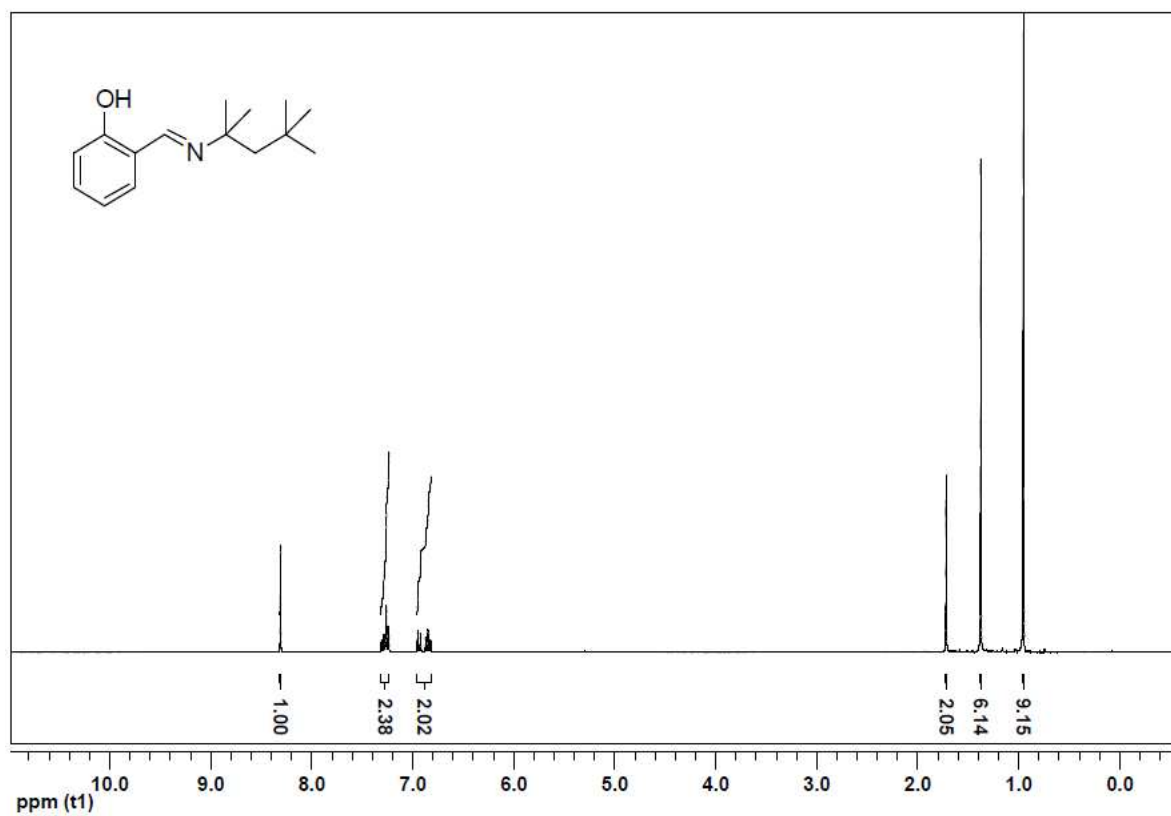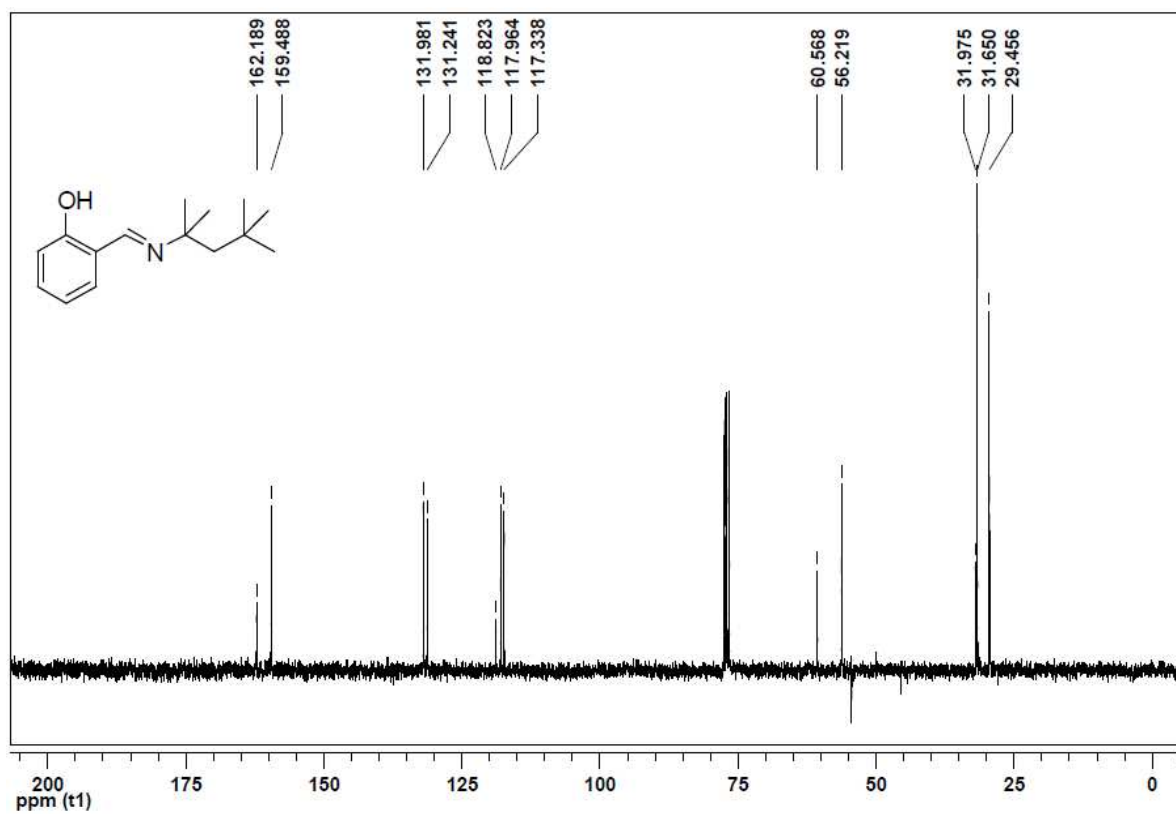

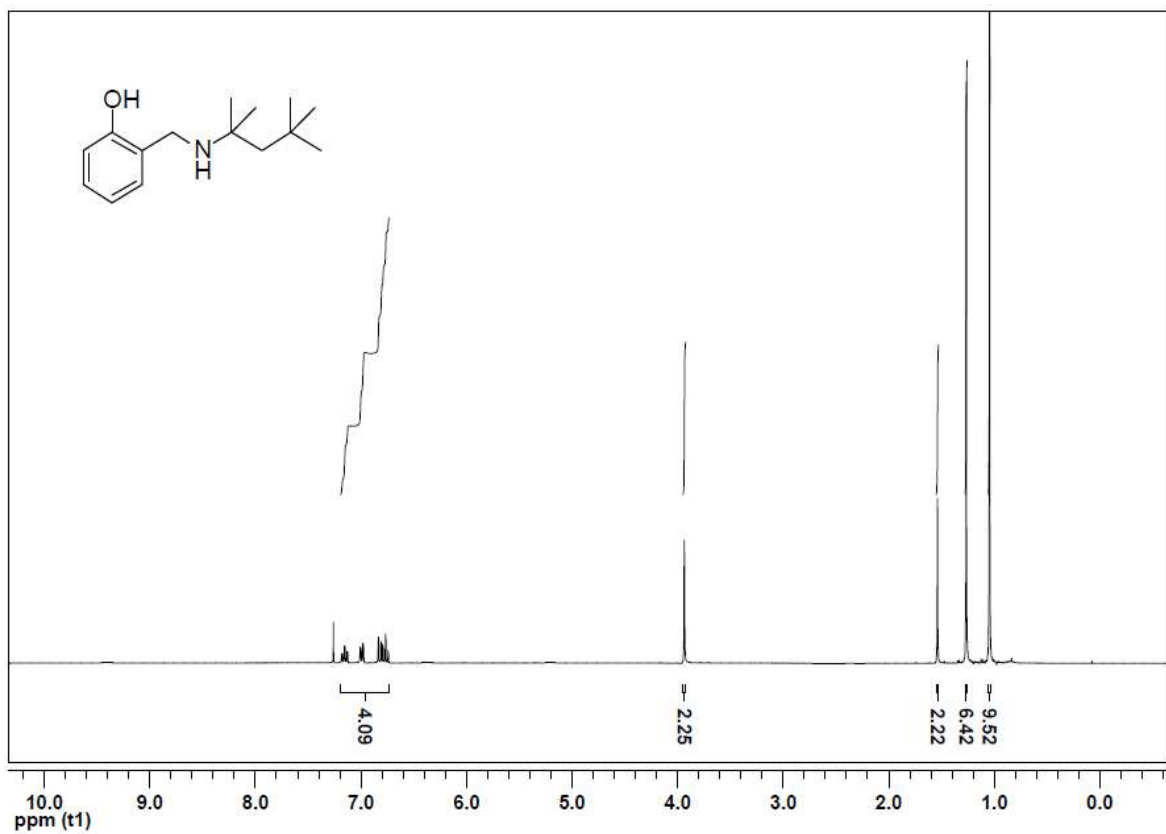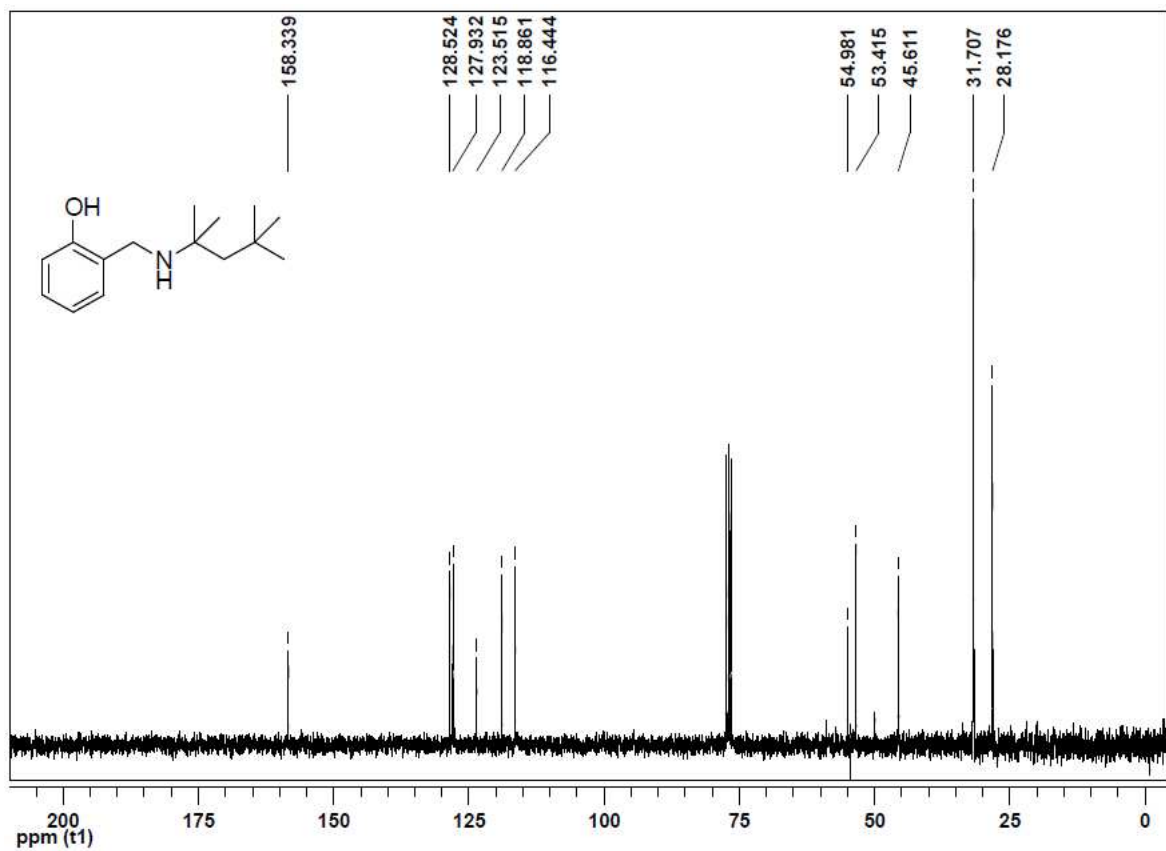

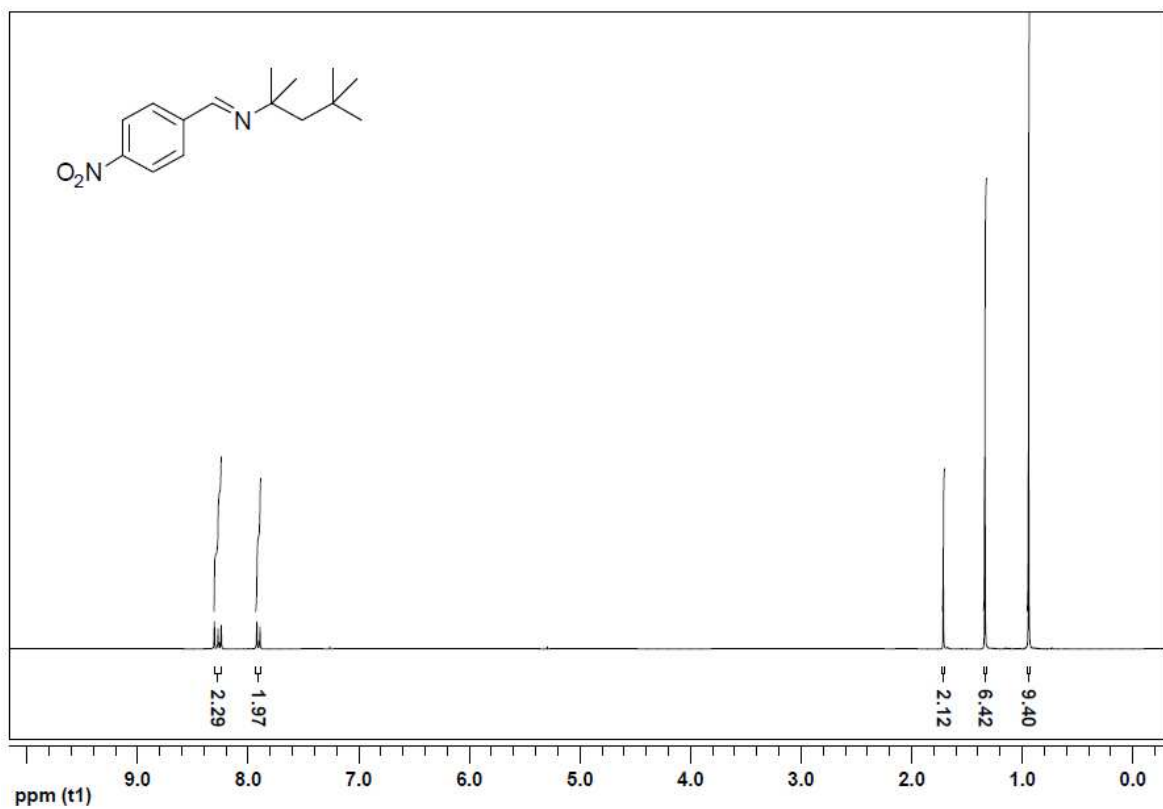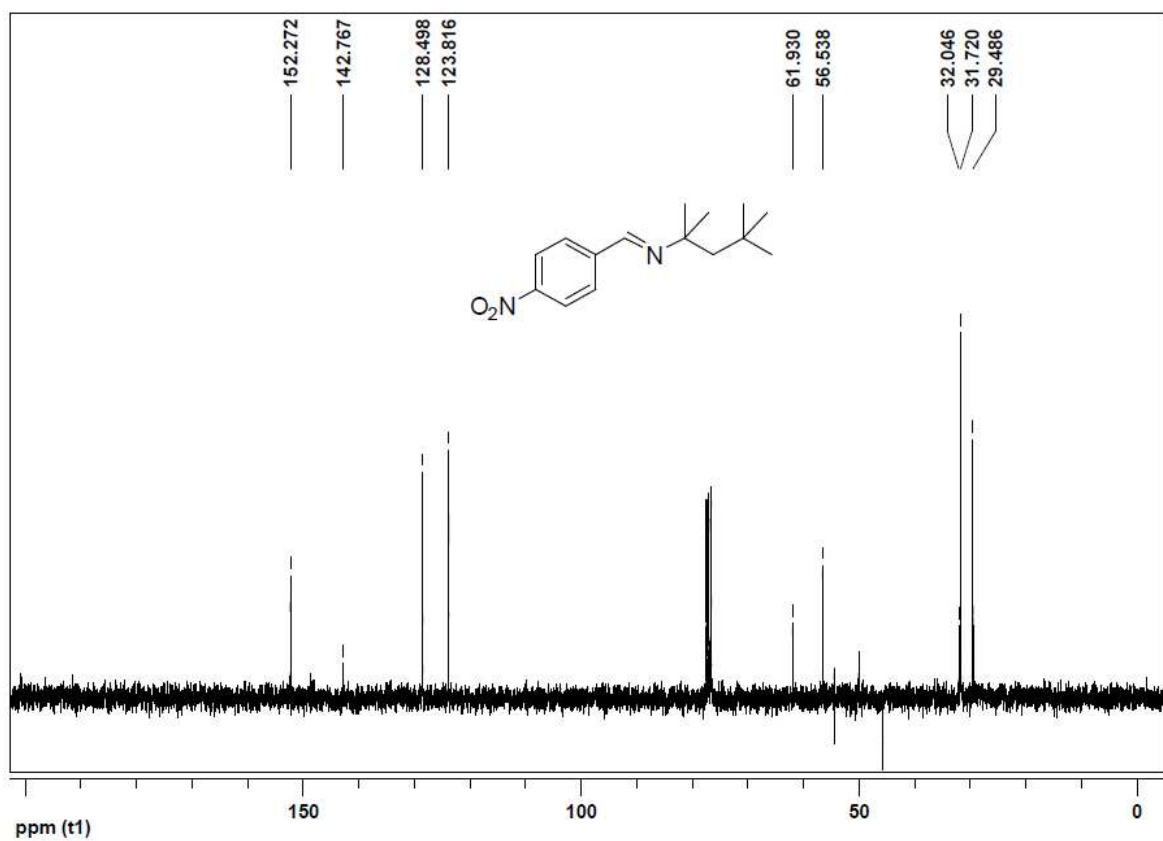

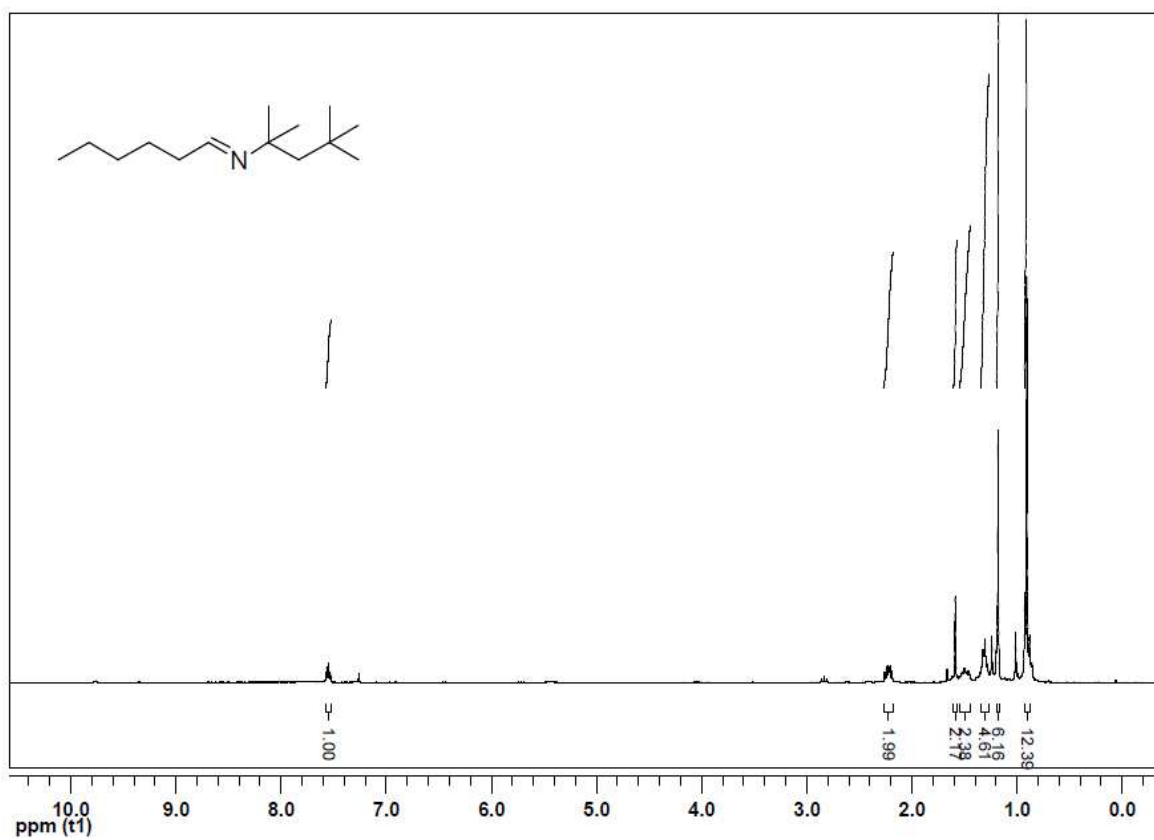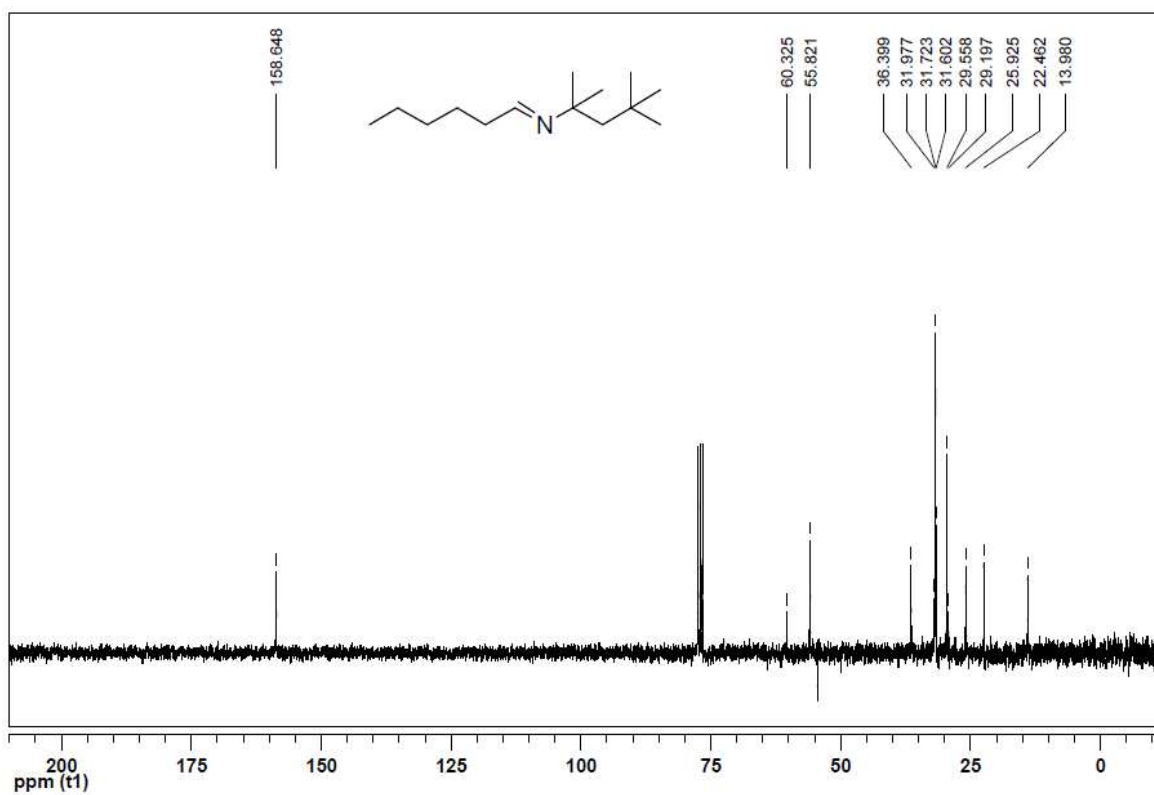

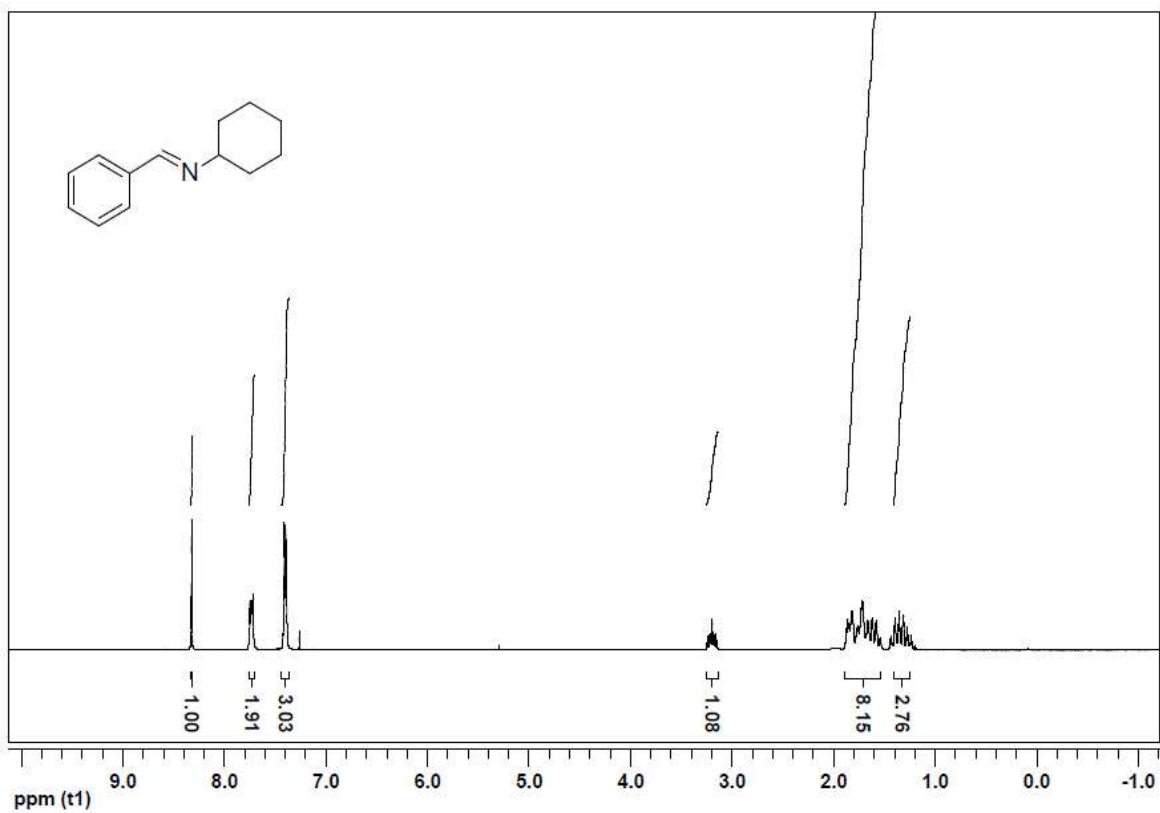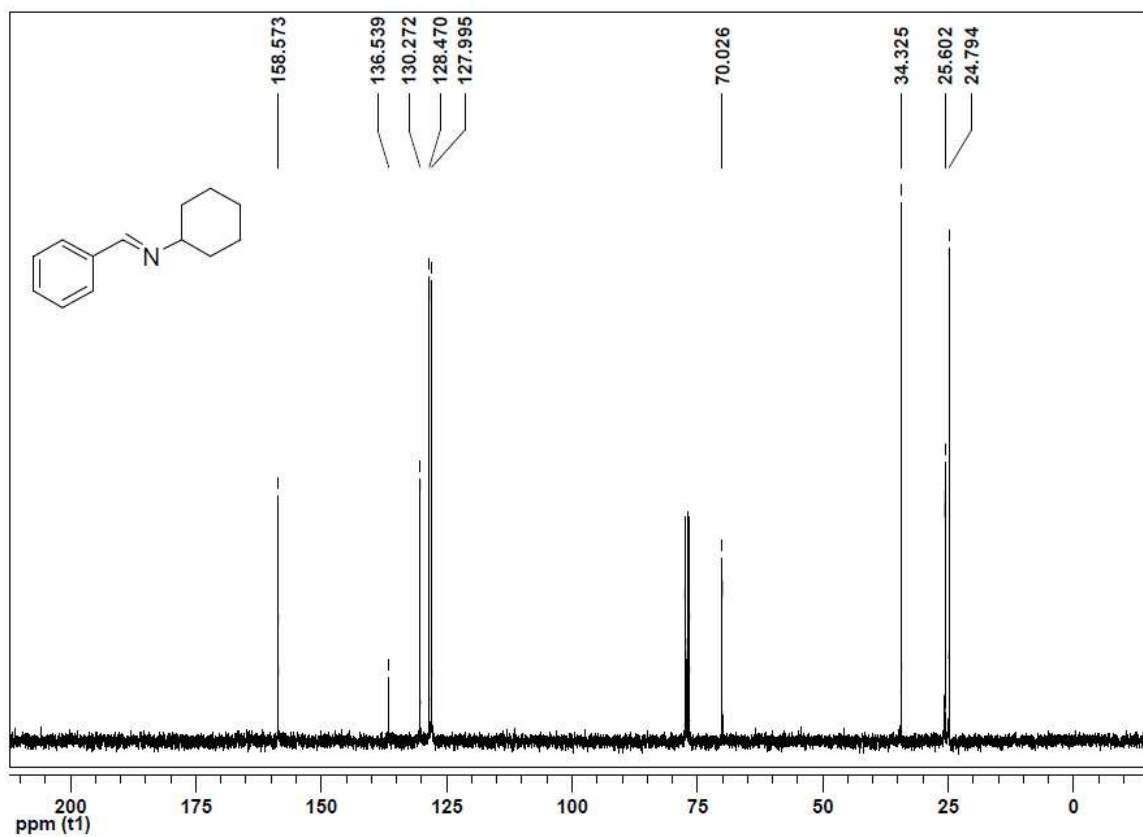



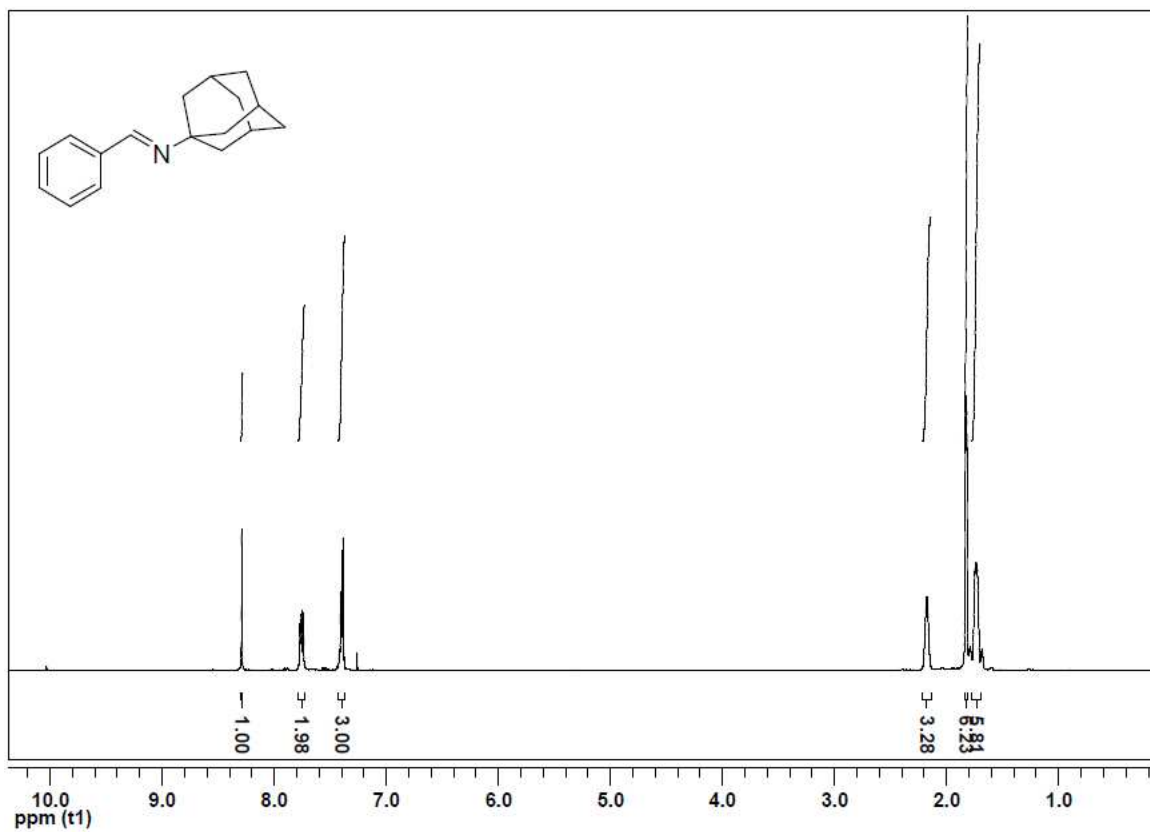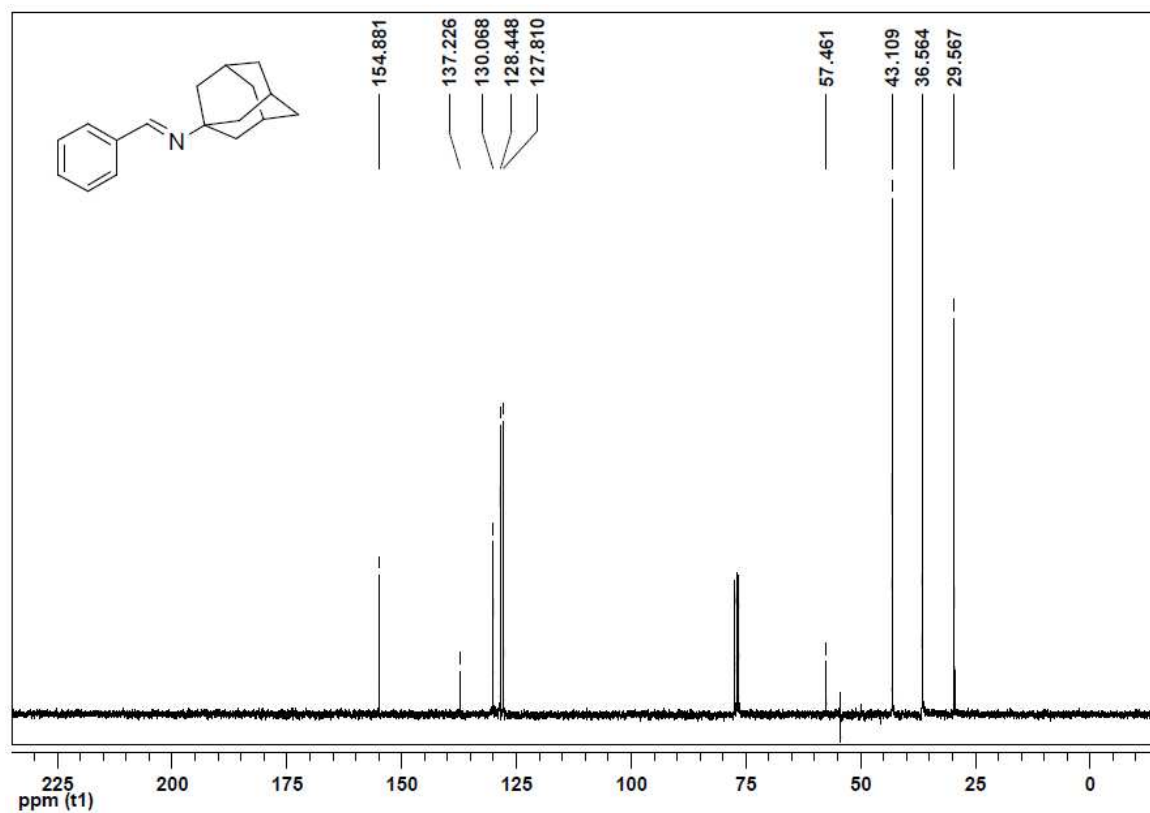

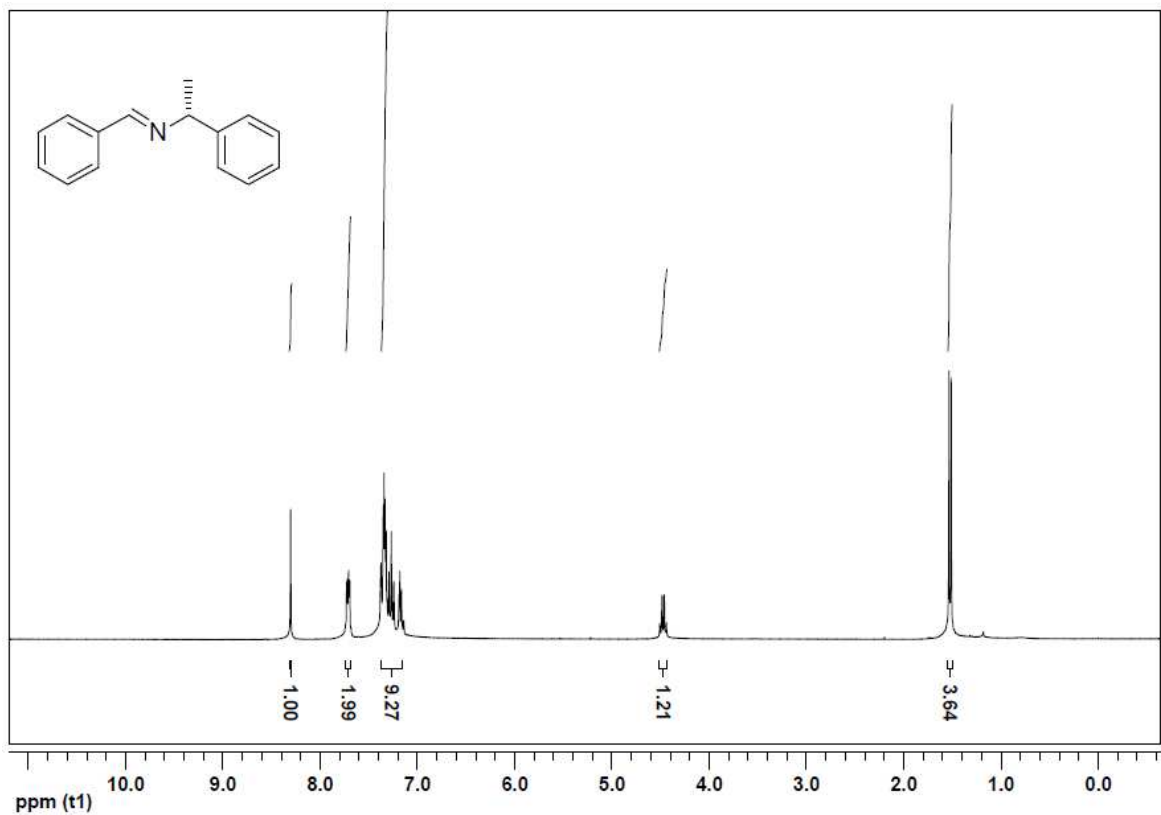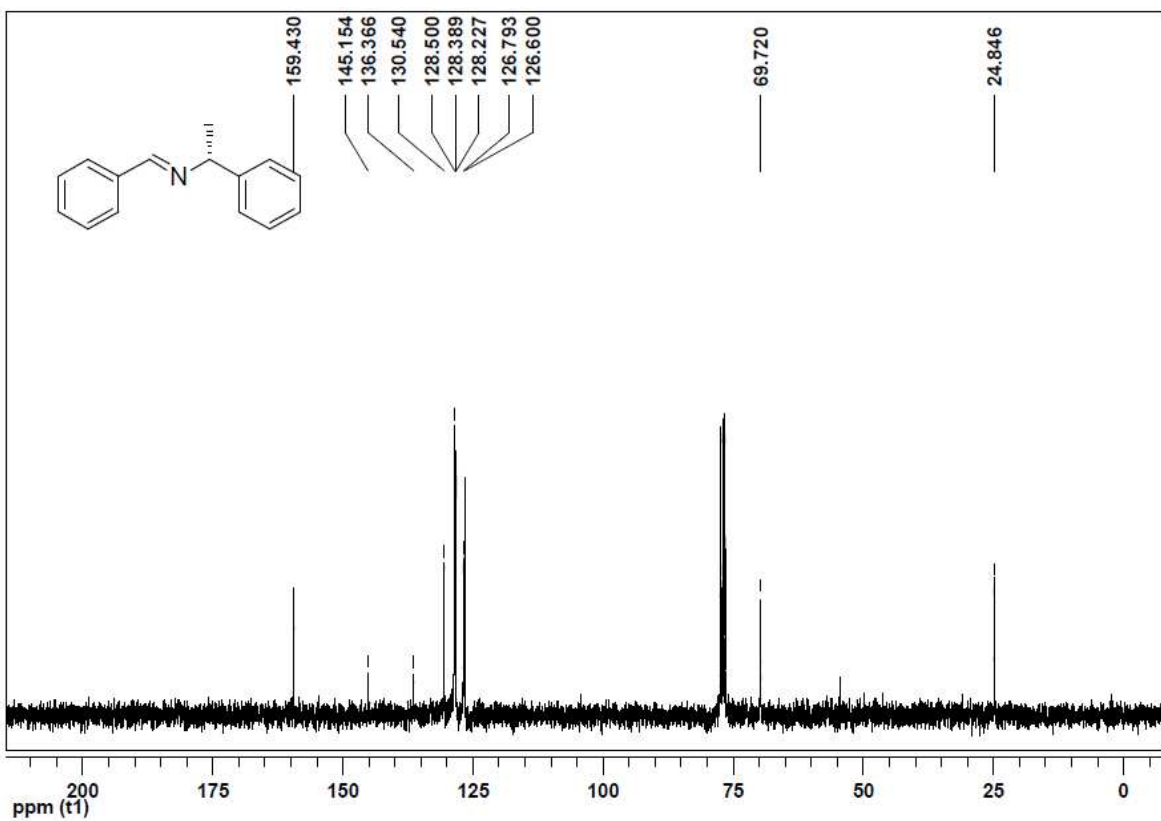

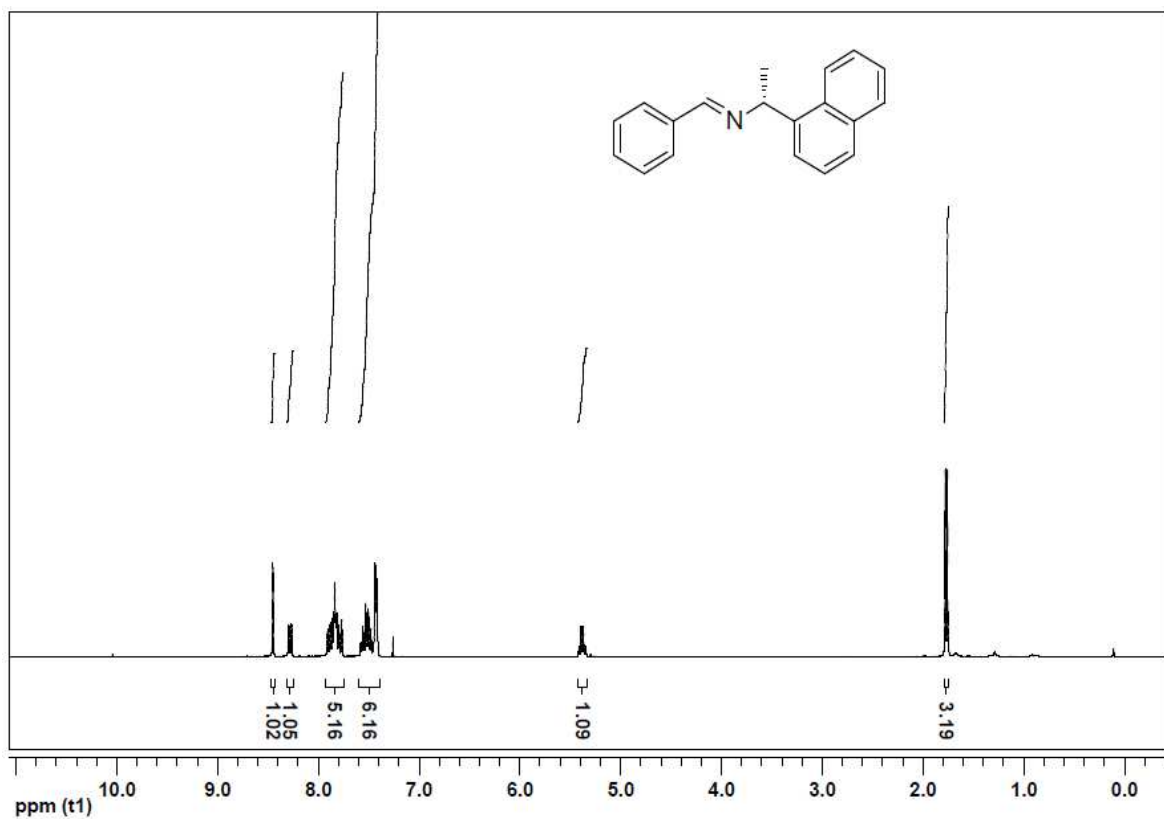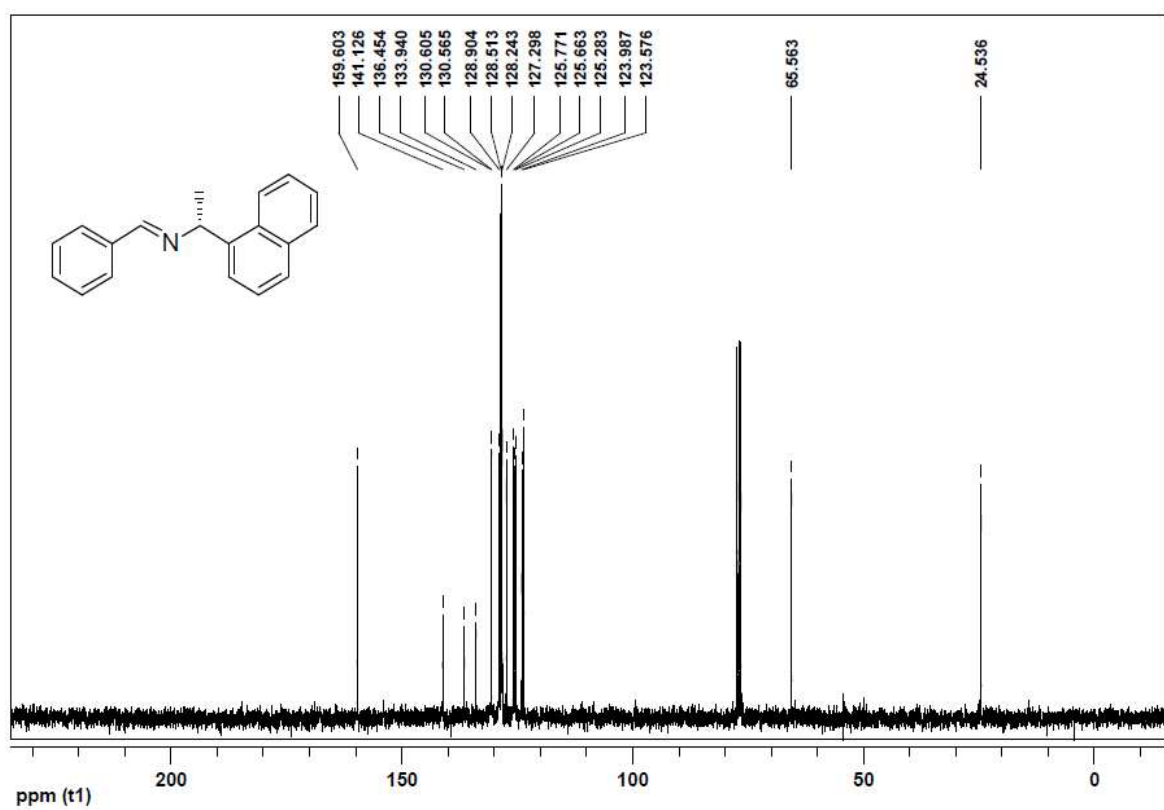

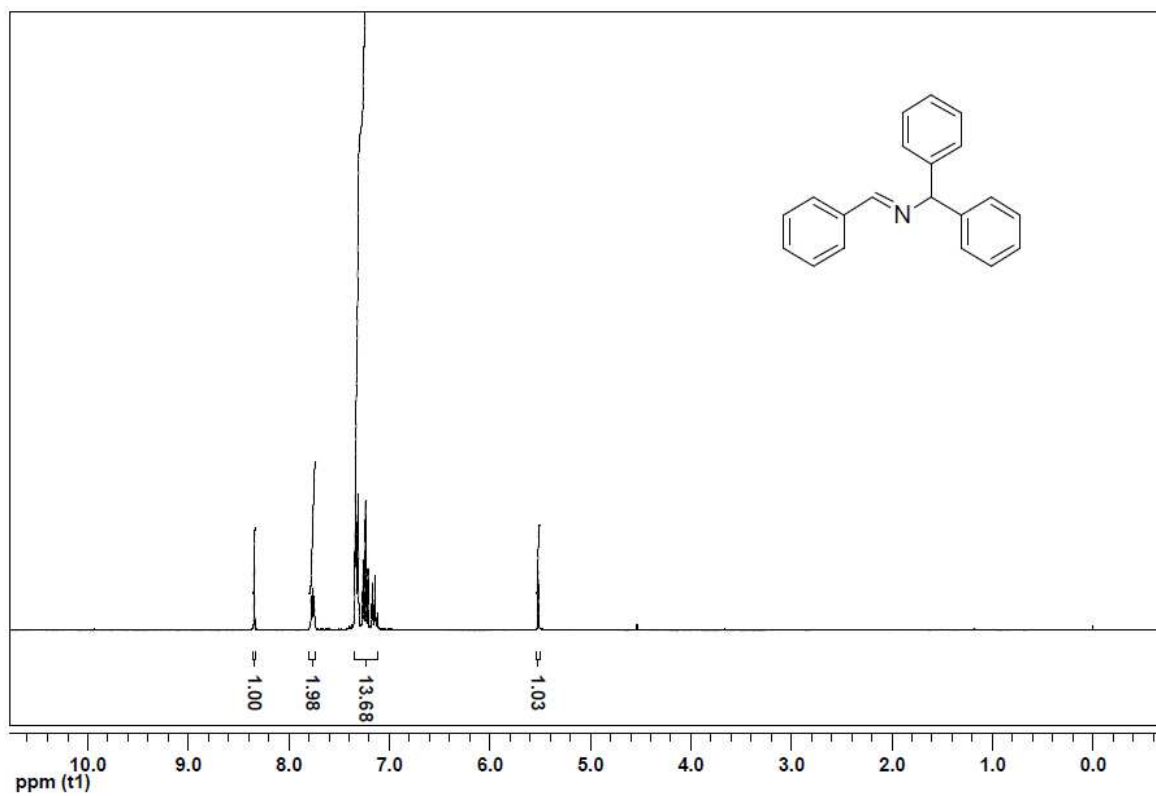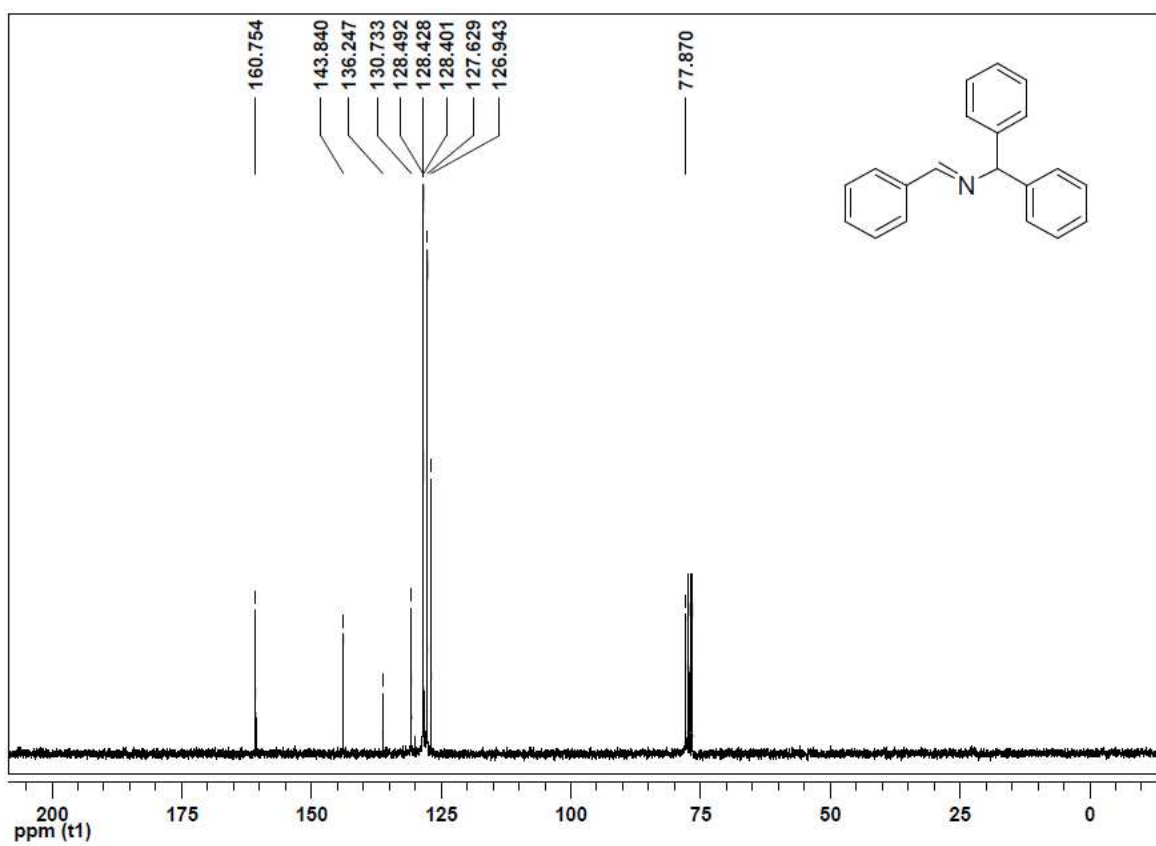

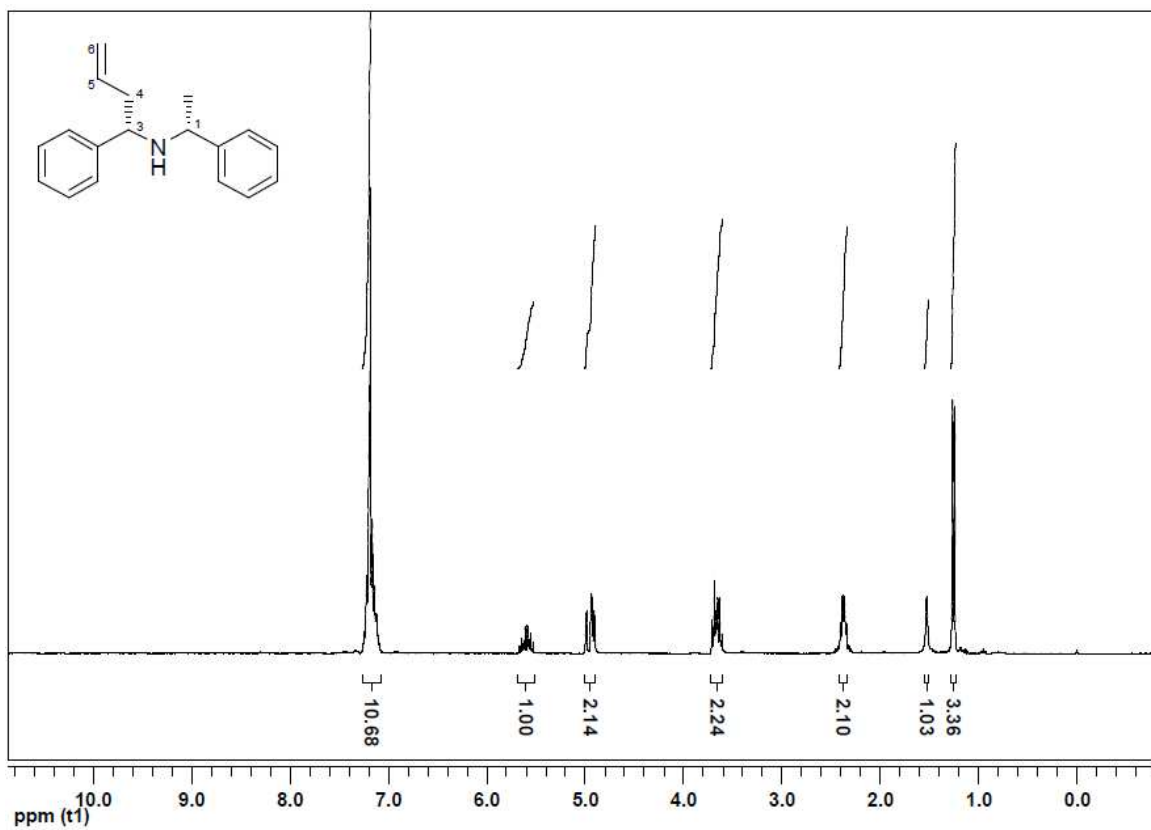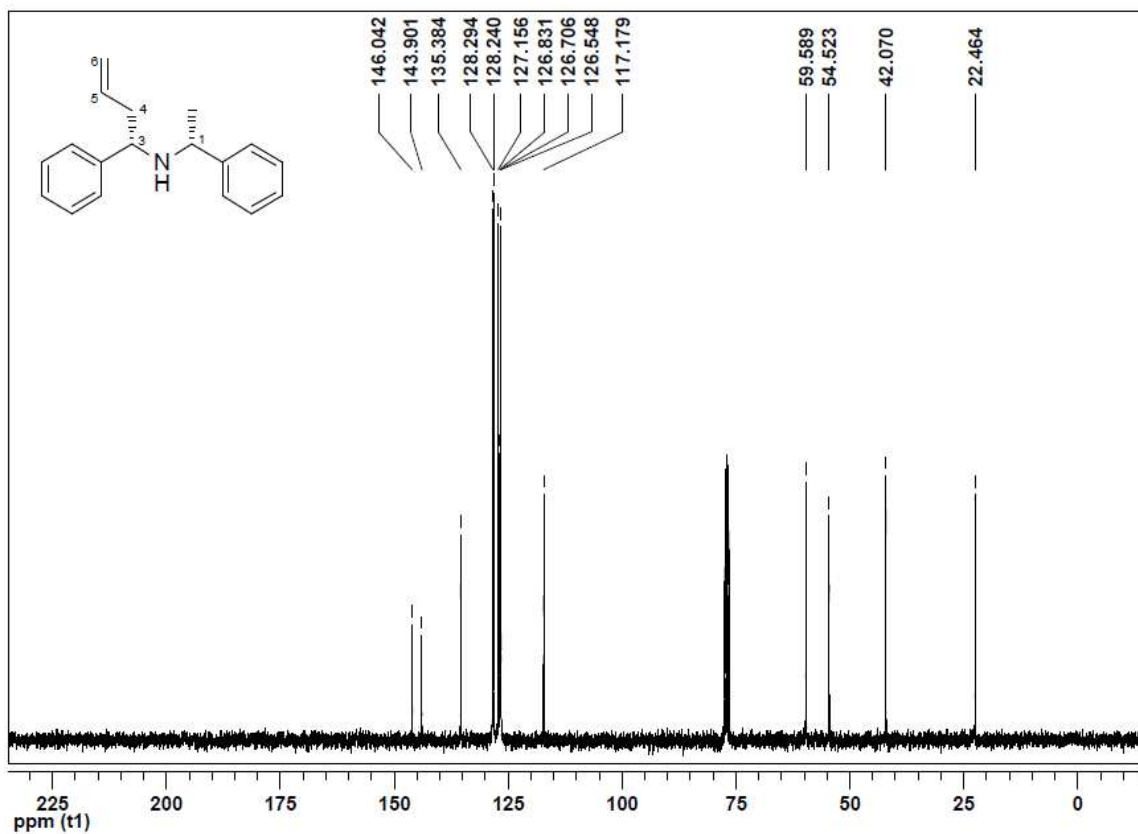

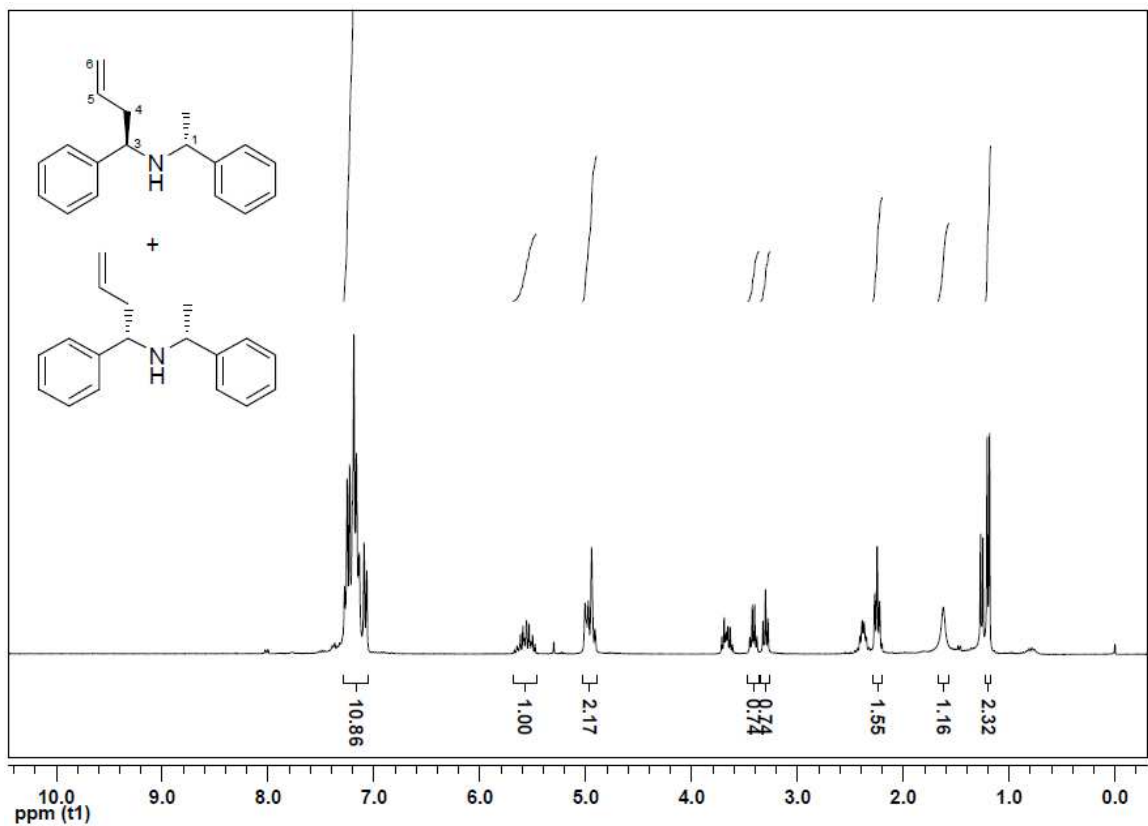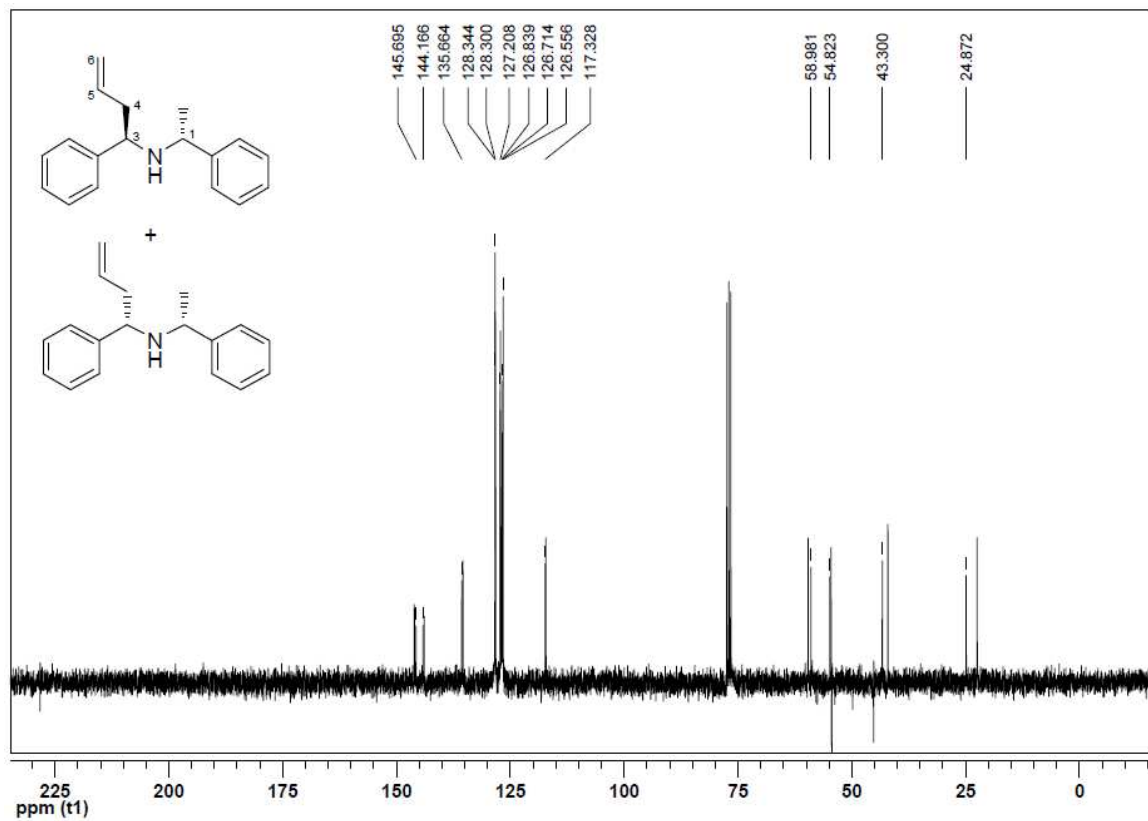

Supplement: Supplementary file 1 [file 4207825]
